# Supplementary material for: Internet-based cognitive–behavioural therapy for prevention of depression during pregnancy and in the post partum (iPDP): a protocol for a large-scale randomised controlled trial
Source: PubMed Central journal article supplement — BMJ Open. 2020 May 17;10(5):e036482. doi: 10.1136/bmjopen-2019-036482 (PMC7239549; doi:10.1136/bmjopen-2019-036482), 2020-05-17
Supplement: bmjopen-2019-036482.draft_revisions.pdf [file bmjopen-2019-036482.draft_revisions.pdf]

# BMJ Open

BMJ Open is committed to open peer review. As part of this commitment we make the peer review history of every article we publish publicly available.

When an article is published we post the peer reviewers' comments and the authors' responses online. We also post the versions of the paper that were used during peer review. These are the versions that the peer review comments apply to.

The versions of the paper that follow are the versions that were submitted during the peer review process. They are not the versions of record or the final published versions. They should not be cited or distributed as the published version of this manuscript.

BMJ Open is an open access journal and the full, final, typeset and author-corrected version of record of the manuscript is available on our site with no access controls, subscription charges or pay-per-view fees (<http://bmjopen.bmj.com>).

If you have any questions on BMJ Open's open peer review process please email [info.bmjopen@bmj.com](mailto:info.bmjopen@bmj.com)

# BMJ Open

## Internet-based cognitive behavioral therapy for prevention of depression during pregnancy and in the postpartum (iPDP): a protocol for a large scale randomized controlled trial

|                               |                                                                                                                                                                                                                                                                                                                                                                                |
|-------------------------------|--------------------------------------------------------------------------------------------------------------------------------------------------------------------------------------------------------------------------------------------------------------------------------------------------------------------------------------------------------------------------------|
| Journal:                      | <i>BMJ Open</i>                                                                                                                                                                                                                                                                                                                                                                |
| Manuscript ID                 | bmjopen-2019-036482                                                                                                                                                                                                                                                                                                                                                            |
| Article Type:                 | Protocol                                                                                                                                                                                                                                                                                                                                                                       |
| Date Submitted by the Author: | 18-Dec-2019                                                                                                                                                                                                                                                                                                                                                                    |
| Complete List of Authors:     | Nishi, Daisuke; The University of Tokyo, Imamura, Kotaro<br>Watanabe, Kazuhiro; The University of Tokyo, Department of Mental Health, Graduate School of Medicine<br>Obikane, Erika<br>Sasaki, Natsu<br>Yasuma, Naonori; The University of Tokyo, ;<br>Sekiya, Yuki<br>Matsuyama, Yutaka; Univ Tokyo<br>Kawakami, Norito; The University of Tokyo, Department of Mental Health |
| Keywords:                     | MENTAL HEALTH, Depression & mood disorders < PSYCHIATRY, PREVENTIVE MEDICINE                                                                                                                                                                                                                                                                                                   |
|                               |                                                                                                                                                                                                                                                                                                                                                                                |

SCHOLARONE™  
Manuscripts

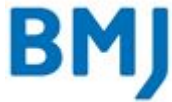

I, the Submitting Author has the right to grant and does grant on behalf of all authors of the Work (as defined in the below author licence), an exclusive licence and/or a non-exclusive licence for contributions from authors who are: i) UK Crown employees; ii) where BMJ has agreed a CC-BY licence shall apply, and/or iii) in accordance with the terms applicable for US Federal Government officers or employees acting as part of their official duties; on a worldwide, perpetual, irrevocable, royalty-free basis to BMJ Publishing Group Ltd ("BMJ") its licensees and where the relevant Journal is co-owned by BMJ to the co-owners of the Journal, to publish the Work in this journal and any other BMJ products and to exploit all rights, as set out in our [licence](#).

The Submitting Author accepts and understands that any supply made under these terms is made by BMJ to the Submitting Author unless you are acting as an employee on behalf of your employer or a postgraduate student of an affiliated institution which is paying any applicable article publishing charge ("APC") for Open Access articles. Where the Submitting Author wishes to make the Work available on an Open Access basis (and intends to pay the relevant APC), the terms of reuse of such Open Access shall be governed by a Creative Commons licence – details of these licences and which [Creative Commons](#) licence will apply to this Work are set out in our licence referred to above.

Other than as permitted in any relevant BMJ Author's Self Archiving Policies, I confirm this Work has not been accepted for publication elsewhere, is not being considered for publication elsewhere and does not duplicate material already published. I confirm all authors consent to publication of this Work and authorise the granting of this licence.

1  
2  
3  
4 Title: Internet-based cognitive behavioral therapy for prevention of depression during pregnancy and  
5  
6 in the postpartum (iPDP): a protocol for a large scale randomized controlled trial  
7  
8  
9  
10  
11

12 Authors: Daisuke Nishi, MD, PhD<sup>1</sup>, Kotaro Imamura, PhD<sup>1</sup>, Kazuhiro Watanabe, PhD<sup>1</sup>, Erika  
13  
14 Obikane, MD<sup>1</sup>, Natsu Sasaki, MD<sup>1</sup>, Naonori Yasuma, MD<sup>1</sup>, Yuki Sekiya, PhD<sup>1</sup>, Yutaka  
15  
16 Matsuyama<sup>2</sup>, PhD, Norito Kawakami, MD, PhD<sup>1</sup>  
17  
18  
19

20 <sup>1</sup>Department of Mental Health, Graduate School of Medicine, The University of Tokyo, 7-3-1  
21  
22 Hongo, Bunkyo-ku, Tokyo 113-0033, Japan  
23

24 <sup>2</sup>Department of Biostatistics, Graduate School of Medicine, The University of Tokyo, 7-3-1 Hongo,  
25  
26 Bunkyo-ku, Tokyo 113-0033, Japan  
27  
28  
29  
30  
31

32 Corresponding author: Daisuke Nishi  
33

34 Department of Mental Health, Graduate School of Medicine, The University of Tokyo, 7-3-1 Hongo,  
35  
36 Bunkyo-ku, Tokyo 113-0033, Japan  
37

38 E-mail: [d-nishi@m.u-tokyo.ac.jp](mailto:d-nishi@m.u-tokyo.ac.jp)  
39  
40  
41  
42  
43  
44  
45  
46  
47  
48  
49  
50  
51  
52  
53  
54  
55  
56  
57  
58  
59  
60

## Abstract

**Introduction:** The objective of this randomized controlled trial (RCT) is to examine the effects of smartphone-based cognitive behavioral therapy (CBT) in preventing the onset of major depressive episodes (MDE) among pregnant women.

**Methods and analysis:** The target study population will be pregnant women of 16 to 20 weeks gestation who are currently users of “Luna Luna Baby”, the most widely used app for pregnant women in Japan. Those who meet the eligibility criteria will be randomly allocated to the 6-module internet cognitive behavioral therapy (iCBT) program that was newly developed for pregnant women (n=2500), or to a treatment-as-usual control group (n=2500). Participants in the intervention groups will be required to complete the program by 32 weeks gestation. The primary outcomes are the number of new onsets of MDE, measured by using the World Health Organization Composite International Diagnostic Interview 3.0 (WHO-CIDI 3.0) at 32 weeks gestation and 3 months postpartum.

**Ethics and dissemination:** The study plan has been approved by the Research Ethics Review Board of the Graduate School of Medicine/Faculty of Medicine, the University of Tokyo (2019150NI). If the intervention programs are found to produce a significant positive effect in this RCT, these programs can be made available for all users of the app in the future.

**Key words:** smartphone-based cognitive behavioral therapy, antenatal depression, postpartum depression, prevention

**Trial registration number:** UMIN000038190; Pre-results.

**Issue date:** 16<sup>th</sup>, Dec, 2019

## Article Summary

### Strengths and limitations of this study

- The large sample size of this RCT can lead to a definitive result of the effectiveness of the fully automated smartphone-based CBT program in preventing both antenatal and postpartum depression.
- The newly developed program designed to handle concerns extracted from pregnant women would be practical and expect low dropout.
- This study will also evaluate the implementation outcomes of the program, which will contribute to the dissemination and implementation of iCBT.
- This RCT will also clarify whether iCBT during pregnancy can prevent maternity blues.
- A limitation of this study is that all of the outcomes will be measured by self-report.

## Introduction

Prevention of perinatal depression is a critical public health issue.[1] The prevalence of antenatal depression was reported to be 7.4% in the first trimester, 12.8% in the second trimester, and 12.0% in the third trimester;[2] and the prevalence of postpartum depression was estimated to be 17.7%, though there is significant heterogeneity across nations.[3] Antenatal depression is associated with failing to seek prenatal care, an inadequate diet and/or use of tobacco, alcohol, or other harmful substances, self-harm or attempted suicide, and postpartum depression; while postpartum depression is associated with negative outcomes such as physical and psychological abuse to their children, and infanticide.[4] Furthermore, perinatal depression can also affect development from fetus to adolescent and paternal depression.[5-10] Therefore, preventing perinatal depression in the antenatal period is crucially important.

Given the large number of pregnant women who have risk factors such as maternal anxiety, life stress, lack of social support, unintended pregnancy, domestic violence, lower income and education, and poor relationships, making it difficult to identify and screen all high-risk pregnant women,[11] universal prevention should be more valued. According to a systematic review and meta-analysis, psychological interventions have been recommended as the most effective approach to prevent antenatal and postpartum depression.[12] Cognitive behavioral therapy (CBT) has been broadly researched and reported to be highly effective among psychological interventions.[13,14] Previous meta-analyses showed that the effect size of psychological intervention as universal prevention for postpartum depression was reported to be 0.19[15] and 0.37.[13] The timing of interventions of RCTs included in these meta-analyses were both during pregnancy and postpartum.

With respect to universal prevention, fully automated internet-based CBT (iCBT) is desirable to face-to-face or guided iCBT in terms of accessibility, anonymity, and cost-effectiveness.[16] Although a systematic review showed a positive effect of iCBT for the improvement of perinatal depressive symptoms,[17] to our knowledge, there have been only two randomized controlled trials (RCTs) for universal prevention using automated iCBT during pregnancy.[18,19] These two studies

1  
2  
3  
4 did not assess the major depressive episode (MDE); instead, they used depressive symptoms as  
5  
6 outcomes. In addition, dropout from iCBT in these studies was relatively high (66% and 44%,  
7  
8 respectively). A large number of sessions and/or the length per session may be impractical for a  
9  
10 substantial number of pregnant women to complete, which may cause a high dropout rate. Thus, it  
11  
12 would be necessary to develop a program that is more acceptable and feasible for pregnant women.  
13  
14

15 The objective of this randomized controlled trial (RCT) is to examine the effectiveness of the  
16  
17 newly developed 6-sessions of 5 to 10-minutes, smartphone-based, automated iCBT programs in  
18  
19 preventing the onset of MDE at the third trimester and 3-months postpartum among pregnant women  
20  
21 currently in the second trimester. The program would be practical and could be utilized by many  
22  
23 pregnant women. In addition, intervention during early pregnancy will enable the prevention of not  
24  
25 only postpartum depression but also antenatal depression.  
26  
27  
28  
29  
30

## 31 **Methods and Analysis**

### 32 **Trial design**

33  
34  
35 The study will be a two-arm, parallel-group, treatment-as-usual (TAU) controlled,  
36  
37 randomized trial. The allocation ratio of the intervention groups to the control group is 1:1. Random  
38  
39 assignments are stratified by K6 scores (groups of 4 points or less and groups of 5 points or more) in  
40  
41 the baseline survey. End-users of an app (“Luna Luna Baby” run by MTI Ltd.) that provides useful  
42  
43 information for pregnant women will be recruited. Follow-up assessments will be conducted at 32  
44  
45 weeks gestation and 3-months postpartum. This protocol is written in accordance with the Standard  
46  
47 Protocol Items: Recommendations for Interventional Trials guideline checklist.[20] Trial start date  
48  
49 was the 27<sup>th</sup> of November, 2019 and the last follow-up date will be the 31<sup>st</sup> of March, 2021.  
50  
51  
52  
53  
54  
55  
56  
57  
58  
59  
60



## Participants

Pregnant women who have user IDs for the latest version of the app and meet the following criteria will be invited to participate in this RCT.

### Eligibility criteria

1. Being over 20 years old
2. Being 16 to 20 weeks gestation
3. Not diagnosed with a major depressive episode in the past month by the web-based self-administered version of the WHO Composite International Diagnostic Interview 3.0 (WHO-CIDI 3.0)[21]
4. Not diagnosed with lifetime bipolar disorder (WHO-CIDI 3.0)
5. Ability to understand the research objectives and give consent

Pregnant women using the app register the date of the last menstruation and the expected date of childbirth in the app. Thus we can find out the number of weeks of pregnancy.

### Recruitment

**Figure 1** shows the study flow of this trial. MTI Ltd. sends an invitation message to potentially eligible pregnant women, which will include an explanation of the study and information on the eligibility criteria. After reading the explanation of the study, potential participants will be invited to give their consent on the app to participate in the study, and to complete and return the baseline survey.

1  
2  
3  
4 MTI Ltd. will also send messages to study participants to join in follow-up assessments.  
5  
6

7           Five thousand pregnant women will be randomized to either the intervention group (n=2500),  
8  
9  
10 or the control group (n=2500). Participants in the intervention groups will be required to complete the  
11  
12  
13 intervention program within 12 weeks after the baseline survey.  
14  
15

16           Participants in the intervention groups will be required to complete the CBT program up to  
17  
18  
19 32 weeks gestation. Participants will be asked not to share this information through any social network.  
20  
21  
22 The participants will be reminded by a popup message to complete the program if they have not already  
23  
24  
25 done so. Intervention programs will be closed at 32 weeks gestation.  
26  
27

28           Participants in the control group will not receive any intervention programs during the  
29  
30  
31 intervention and follow-up period. General information about mental health during pregnancy will be  
32  
33  
34 provided to participants in both the intervention group and the control group as a TAU.  
35  
36  
37  
38  
39

## 40 **Interventions**

41  
42

43           A smartphone-based six-module CBT program designed for pregnant women was newly  
44  
45  
46 developed. This program will be provided via the Luna Luna Baby app, so users of the app don't have  
47  
48  
49 to download another app. Some components of the modules were derived from a previous iCBT  
50  
51  
52 program that successfully prevented the onset of MDE among office workers.[22] Other components  
53  
54  
55 such as behavioral activation based on values, self-compassion and mindfulness have been  
56  
57  
58 incorporated, which could be regarded as the third wave CBT. The six modules are presented in a fixed  
59  
60

1  
2  
3  
4 order, with one module accessible per week, from module 1 to module 6. It will take about 5 min to  
5  
6  
7 complete each module. The program includes psychoeducation (module 1), case formulation based on  
8  
9  
10 a cognitive behavioral model (module 2), behavioral activation (module 3), self-compassion (module  
11  
12  
13 4), mindfulness (module 5), and problem-solving (module 6). Details of each of the components are  
14  
15  
16 as follows.

### 17 18 19 **Psychoeducation (module 1)**

20  
21  
22 In this module, participants learn about the roles of what are generally called “negative”  
23  
24  
25 emotions such as anxiety, depressive mood and anger. Each emotion is necessary for us; for example,  
26  
27  
28 anxiety is a sign that warns us of some risk in the future, and promotes us to prepare for the future.  
29  
30  
31 This module was designed to help participants face and deal with their own emotions in subsequent  
32  
33  
34 modules.

### 35 36 37 **Case formulation based on cognitive-behavioral model (module 2)**

38  
39  
40 In this module, participants learn about a cognitive-behavioral (CB) model, especially the  
41  
42  
43 five-part model (situation, thoughts, emotions, behavior and physical sensations) and a case  
44  
45  
46 formulation based on this model.[23] Case formulation is a method used to understand the problems  
47  
48  
49 of patients or clients. Case formulation is helpful for participants to choose an appropriate approach to  
50  
51  
52 change the vicious circles of these five areas.

### 53 54 55 **Behavioral activation (module 3)**

56  
57  
58 Behavioral activation is a process to increase pleasurable and rewarding activities using  
59  
60

1  
2  
3  
4 behavioral strategies such as activity scheduling. This module provides a behavioral activation  
5  
6  
7 technique for enhancing participants' liveliness. In this module, participants learn about the theory of  
8  
9  
10 behavioral activation and how to plan an activity schedule to increase pleasant activities. Participants  
11  
12  
13 are also encouraged to identify their values, based on brief behavioral activation therapy for depression  
14  
15  
16 (BATD),[24] and acceptance and commitment therapy (ACT).[25]  
17

#### 18 19 **Self-compassion (module 4)**

20  
21  
22 Self-compassion indicates a positive and caring attitude of a person towards herself in the face  
23  
24  
25 of stressful events.[26] As a result of this attitude, individuals who are highly self-compassionate are  
26  
27  
28 expected to experience higher individual well-being.[27] Three interrelated determine the self-  
29  
30  
31 compassionate reactions to negative events and experiences: self-kindness, sense of common humanity  
32  
33  
34 and mindfulness. In this module, participants learn the concept of self-compassion and how to express  
35  
36  
37 compassion towards themselves.  
38  
39

#### 40 41 **Mindfulness (module 5)**

42  
43 Mindfulness is defined as “paying attention in a particular way: on purpose, in the present  
44  
45  
46 moment, and nonjudgmentally”.[28] Mindful persons are likely to be aware of the physical sensation,  
47  
48  
49 thoughts, and emotions at that moment, which enables them to stop their usual reactions to a stressful  
50  
51  
52 event so that symptoms and problematic behaviors are likely to disappear. In this module, participants  
53  
54  
55 learn about the concept of mindfulness and how to practice it through listening to voice guidance.  
56  
57

#### 58 59 **Problem-solving (module 6)**

1  
2  
3  
4 Problem-solving technique is a CB intervention that focuses on training adaptive problem-  
5  
6  
7 solving attitudes and skills.[29] A rational problem-solving style contains the systematic application  
8  
9  
10 of four problem-solving skills: (1) problem definition and formulation, (2) generation of alternative  
11  
12  
13 solutions, (3) decision making and (4) solution implementation and verification. In this module,  
14  
15  
16 participants learn about problem-solving skills to sort out the problem and make a list of solutions, and  
17  
18  
19 assertiveness to communicate with their partners confidently.  
20  
21  
22  
23  
24

## 25 **Outcomes**

26  
27  
28 **Table 2** shows an overview of the outcome measures. Those who have not responded by more  
29  
30  
31 than a week after the online questionnaire is distributed will receive a popup message to complete each  
32  
33  
34 assessment.  
35  
36

## 37 **Primary outcome**

38  
39  
40 The primary outcome is the onset of MDE during the 32 weeks gestation and 3 months  
41  
42  
43 postpartum. The onset of MDE during the follow-up will be assessed using the web-based self-  
44  
45  
46 administered version of the Japanese WHO-CIDI 3.0 depression section, according to DSM-IV-TR  
47  
48  
49 criteria. The web version has been shown to have a good concordance with the clinical diagnosis of  
50  
51  
52 MDE and to be reliable in a 1-year test-retest survey. An incident case with MDE will be identified if  
53  
54  
55 a respondent reports an episode of MDE at either 32 weeks gestation or 3 months postpartum. An onset  
56  
57  
58 month for an episode of MDE also will be requested. In addition, two other definitions are applied to  
59  
60

1  
2  
3  
4 identify sub-threshold depressive episodes: one requires a shorter duration of symptoms (i.e. 7 days or  
5  
6  
7 more, rather than 2 weeks or more); the other one requires having a fewer symptoms (i.e. having 3  
8  
9  
10 symptoms or more, instead of 5 symptoms or more).  
11

## 12 13 **Secondary outcomes**

### 14 15 16 **The Edinburgh Postnatal Depression Scale (EPDS)**

17  
18  
19 EPDS is used most often for screening perinatal depression because it focuses on cognitive  
20  
21  
22 symptoms of depression and excludes somatic items that can generate false positives during  
23  
24  
25 pregnancy and postpartum. It consists of 10 items, with 0-3 points scored per item for a potential  
26  
27  
28 scale score of 0-30. The higher scores indicate more severe depressive symptoms. EPDS will be  
29  
30  
31 conducted at baseline, 32 weeks gestation, 1 week postpartum and 3 months postpartum.  
32

### 33 34 **Kessler's Psychological Distress Scale (K6)**

35  
36  
37 Psychological distress is measured by the Japanese version of K6.[30,31] K6 consists of six  
38  
39  
40 items assessing the frequency with which respondents have experienced symptoms of psychological  
41  
42  
43 distress during the past 30 days. The response options range from 0 (none of the time) to 4 (all of the  
44  
45  
46 time), and the total score ranges from 0 to 24. The higher scores indicate more severe psychological  
47  
48  
49 distress. K6 will be conducted at baseline, 32 weeks gestation, 1 week postpartum and 3 months  
50  
51  
52 postpartum.  
53

### 54 55 **EuroQol -5 dimension-5 level (EQ-5D-5L)**

56  
57  
58 General health status will be measured by the EQ-5D-5L.[32-34] It is a 5-dimensional utility  
59  
60

1  
2  
3  
4 instrument consisting of domains about morbidity, self-care, usual activities, pain or discomfort, and  
5  
6  
7 anxiety or depression. Each domain is divided into 5 levels of severity (none, slight, moderate,  
8  
9  
10 severe, extreme problems, or unable to). All responses are converted into a single index score of  
11  
12  
13 general health status. ED-5D-5L will be conducted at baseline, 32 weeks gestation and 3 months  
14  
15  
16 postpartum.

### 17 18 19 **Somatic symptom Scale-8 (SSS-8)**

20  
21  
22 Somatic symptoms will be measured by Japanese version of SSS-8.[35,36] SSS-8 consists  
23  
24  
25 of 8 items that assess the following symptoms: stomach or bowel problems; back pain; pain in the  
26  
27  
28 arms, legs, or joints; headaches; chest pain or shortness of breath; dizziness; feeling tired or having  
29  
30  
31 low energy; and trouble sleeping. These items comprise the four symptom domains of  
32  
33  
34 gastrointestinal, pain, cardiopulmonary, and fatigue. Respondents rate how much each symptom has  
35  
36  
37 bothered them during the previous 7 days and score each item from 0 to 4: not at all (0), a little bit  
38  
39  
40 (1), somewhat (2), quite a bit (3), and very much (4). The total score ranges from 0 to 32. A higher  
41  
42  
43 score reflects a more severe somatic symptom burden. SSS-8 will be conducted at baseline, 32 weeks  
44  
45  
46 gestation and 3 months postpartum.

### 47 48 49 **Tachikawa Resilience Scale (TRS)**

50  
51  
52 Resilience will be measured by TRS.[37] TRS consists of 10 items. All items are scored on  
53  
54  
55 a 7-point scale from 1 (strongly disagree) to 7 (strongly agree), with a total score ranging from 10 to  
56  
57  
58 70. Higher scores reflect higher resilience. TRS will be conducted at baseline, 32 weeks gestation  
59  
60

1  
2  
3  
4 and 3 months postpartum.  
5  
6

### 7 **The Insomnia Severity Index (ISI)** 8 9

10 Insomnia will be measured by the Japanese version of ISI.[38,39] ISI consists of 7 items  
11  
12 assessing the severity of sleep-onset and sleep maintenance difficulties (both nocturnal and early  
13  
14 morning awakenings), satisfaction with the current sleep pattern, interference with daily functioning,  
15  
16 awareness of impairment attributed to the sleep problem, and degree of distress or concern caused by  
17  
18 the sleep problem. Each item is rated on a 0 to 4 scale and the total score ranges from 0 to 28. A  
19  
20 higher score suggests more severe insomnia. ISI will be conducted at baseline, 32 weeks gestation  
21  
22 and 3 months postpartum.  
23  
24  
25  
26  
27  
28  
29

### 30 **Cambridge-Hopkins questionnaire short form (CH-RLSq13)** 31 32

33 Restless legs syndrome (RLS) will be measured by the Japanese version of CH-  
34  
35 RLSq13.[40,41] CH-RLSq13 consists of 13 items. Diagnosis of RLS is performed using 10 items  
36  
37 consisting of questions about discomfort and stiffness of the lower limbs. In addition, 2 items ask  
38  
39 about the degree of pain and the frequency of occurrence and 1 item asks about the age of onset  
40  
41 (relevant to pregnancy in women). CH-RLSq13 will be conducted at baseline, 32 weeks gestation  
42  
43 and 3 months postpartum.  
44  
45  
46  
47  
48  
49  
50

### 51 **Maternal Anxiety Scale for 4-5-month-old children** 52 53

54 Maternal anxiety will be measured by the Maternal Anxiety Scale for 4-5-month-old  
55  
56 children.[42] This scale consists of 34 items. Eleven items assess childcare anxiety, 6 items assess  
57  
58  
59  
60



1  
2  
3  
4 husbands' or partners' support, 5 items assess childcare satisfaction, 4 items assess ease of raising  
5  
6  
7 children, 5 items assess a lack of confidence, and 3 items assess presence or absence of advisors. All  
8  
9  
10 items are scored on a 4-point scale from 1 (strongly disagree) to 4 (strongly agree). A higher score of  
11  
12  
13 each subscale reflects a higher presence of each factor. This scale will be conducted at 3 months  
14  
15  
16 postpartum.

### 17 18 19 **Medical economic costs**

20  
21  
22 For cost-effectiveness analysis, the presence or absence, frequency and duration of medical  
23  
24  
25 service use, and the use of drugs over the prior three months will be asked at 32 weeks gestation and  
26  
27  
28 3 months postpartum.

### 29 30 31 **Process evaluation**

### 32 33 34 **Implementation outcomes**

35  
36  
37 Time spent logged in to each module will be measured. Also, we will evaluate implementation  
38  
39  
40 outcomes by self-report. Proctor and colleagues suggested 8 conceptually distinct implementation  
41  
42  
43 outcomes: acceptability, adoption, appropriateness, feasibility, fidelity, implementation cost,  
44  
45  
46 penetration, and sustainability.[43] However, a systematic review examined implementation outcomes  
47  
48  
49 for mental health and behavioral health using evidence-based rating criteria and concluded that the  
50  
51  
52 majority of instrumental outcomes were underdeveloped.[44] Recently, Weiner et al. developed  
53  
54  
55 measures of acceptability, appropriateness, and feasibility because their outcomes are often used as  
56  
57  
58 leading indicators and are conceptually distinct.[45] Three of the authors (DN, EO, NS) reviewed the  
59  
60

1  
2  
3  
4 previous literature and selected the possible outcomes for each dimension of acceptability,  
5  
6  
7 appropriateness, and feasibility. These implementation outcomes and satisfaction with the intervention  
8  
9  
10 program will be asked about at 34 weeks gestation.  
11

### 12 13 **Adverse effects**

14  
15  
16 Three of the authors (DN, EO, NS) reviewed the previous literature based on a systematic  
17  
18  
19 review, and selected the possible adverse effects of the program, such as physical symptoms (e.g., tired  
20  
21  
22 eyes, stiff shoulders), mental symptom (e.g., insomnia), dangerous experiences (e.g., collide with  
23  
24  
25 people while walking and looking at the smartphone), too much use of the smartphone, and excessive  
26  
27  
28 pressure to learn this program regularly. These potential adverse effects will be asked about at 34  
29  
30  
31 weeks gestation.  
32

### 33 34 **Data collection**

35  
36  
37 All data will be collected by the internet. If the entered data is incomplete, participants will  
38  
39  
40 not be able to proceed the assessment.  
41  
42  
43  
44  
45

### 46 47 **Sample size calculation**

48  
49 Required sample size was calculated for the primary outcome. New onset of MDE during the  
50  
51  
52 observation period in Japan and the effect size in hazard ratio are estimated to be 5% and 0.65,[46]  
53  
54  
55 based on previous studies. Thirty percent of participants are expected to drop out of the follow-up  
56  
57  
58 assessment. Given an  $\alpha$  level of 0.05 (two-tailed) and a  $\beta$  level of 0.20, power Cox was performed with  
59  
60

1  
2  
3  
4 STATA 14.0 and the appropriate sample size was calculated to be 4812. Since a large number of  
5  
6  
7 participants using the app will be recruited on one day, it is considered difficult to stop recruiting  
8  
9  
10 immediately when the sample size is reached. Thus, the sample size was set at 5,000.  
11  
12  
13  
14  
15

## 16 **Randomization**

17  
18  
19 Participants who meet the inclusion criteria will be randomly allocated to the intervention  
20  
21  
22 group or control group. Participants will be stratified into two strata according to the score of K6 (4 or  
23  
24  
25 less, or 5 or more) on the baseline survey. MTI Ltd. will send baseline data stored in the cloud to  
26  
27  
28 researchers. In addition to the analysis of the whole sample (to examine the universal intervention  
29  
30  
31 effect), we will also analyze data by prespecified subgroups (to examine the selective intervention  
32  
33  
34 effect). Using a computer-generated random allocation sequence, an independent biostatistician  
35  
36  
37 created a stratified permuted-block random table. The block size of this RCT will be fixed at 4. The  
38  
39  
40 stratified permuted-block random table will be password protected and blinded to the researcher. Only  
41  
42  
43 the research assistant will be able to access it during the work of random allocation. MTI Ltd. will  
44  
45  
46 make the study participants allocated to the intervention group available to view the iCBT program on  
47  
48  
49 the app, based on the allocation provided by the research assistant.  
50  
51  
52  
53  
54

## 55 **Statistical methods**

### 56 57 58 **Main analysis** 59 60

1  
2  
3  
4 A survival analysis will be conducted to test for the effectiveness of the intervention on the  
5  
6  
7 time to the onset of MDE while controlling for censoring effects due to the differential length of  
8  
9  
10 follow-up or the completion of follow-up without an onset of MDE. Length of follow-up for each  
11  
12  
13 participant will be represented by either the number of months between the baseline and the onset of  
14  
15  
16 MDE or the end of the follow-up period (3-month postpartum, or 32 weeks gestation if a participant  
17  
18  
19 dropped out at the 3-month postpartum follow-up), whichever comes first. The cumulative incidence  
20  
21  
22 of MDE at the 32 weeks gestation and 3-month postpartum follow-up, as well as event-free survivals  
23  
24  
25 at every follow-up month, will be estimated using the Kaplan–Meier method; the statistical  
26  
27  
28 significance will be tested of the difference between the cumulative proportions of having MDE at 32  
29  
30  
31 weeks gestation and 3-month postpartum follow-ups in the intervention and control groups. A log-  
32  
33  
34 rank test will be conducted to test the difference in survival probabilities between the intervention and  
35  
36  
37 the control groups. A single covariate Cox discrete time hazard model will also be used to test the  
38  
39  
40 difference and estimate the hazard ratio (HR), with 95% confidence intervals (CIs), for having MDE  
41  
42  
43 in the intervention group compared to the control group. The intervention effect will also be estimated,  
44  
45  
46 adjusting for dependent censoring and using the inverse probability of the censoring weighted (IPCW)  
47  
48  
49 method for conducting a sensitivity analysis.[47] The number needed to treat (NNT) to achieve  
50  
51  
52 prevention of one case of the onset of MDE will be calculated at 32 weeks gestation and 3-month  
53  
54  
55 postpartum follow-ups. A similar Cox discrete time hazard model also will be conducted using the two  
56  
57  
58 types of sub-threshold diagnoses of depressive episodes to investigate the effects of iCBT on  
59  
60

1  
2  
3  
4 preventing depressive episodes, including subclinical cases. An intention-to-treat (ITT) analysis will  
5  
6  
7 be conducted.  
8  
9

### 10 **Secondary analyses**

11  
12  
13 For secondary outcomes (i.e. EPDS, K6, SSS-8, TRS), mixed models for repeated measures  
14  
15  
16 analyses will be conducted using a group (intervention or control) × time (baseline, 32 weeks gestation,  
17  
18  
19 1 week postpartum or 3-month postpartum follow-up) interaction as an indicator of the intervention  
20  
21  
22 effect. The level of statistical significance for all analyses in this study will be set at 0.05 (two-tailed),  
23  
24  
25 and 95% CIs will be calculated. The effect size will be estimated in two ways. First, we will estimate  
26  
27  
28 a regression coefficient for a group (the intervention group vs. the control group) x time (baseline and  
29  
30  
31 follow-ups) interaction using the MIXED procedure, which will be converted to an effect size by  
32  
33  
34 dividing by a pooled SD at baseline and at follow-ups. Second, we will calculate Cohen's d among  
35  
36  
37 completers at baseline for each follow-up. ITT will be conducted as well. All statistical analyses will  
38  
39  
40 be conducted using SPSS Statistics 21.0 (IBM Corp., USA).  
41  
42

### 43 **Subgroup analysis**

44  
45  
46 The effectiveness of the programs may differ according to the initial severity of psychological  
47  
48  
49 distress. Therefore, we will use the stratification factor (i.e., participants who scored 4 or less/5 or more  
50  
51  
52 in K6 at the baseline survey) and analyze the results according to the prespecified subgroups.  
53  
54

### 55 **Cost-effectiveness analysis**

56  
57  
58 Quality-adjusted life-years (QALYs) will be calculated as the effectiveness, using the EQ-  
59  
60

1  
2  
3  
4 5D-5L, as the area under the curve defined by the unitality values at baseline and follow-ups.[48] As  
5  
6  
7 for the costs, the cost of medical service use will be calculated based on the Survey of Medical Care  
8  
9  
10 Activities in Public Health Insurance,[49] which shows the treatment expenses covered by public  
11  
12  
13 health insurance in each diagnostic category. No intervention costs such as salary for therapists will  
14  
15  
16 be calculated because the program is fully-automated. Mean differences for the calculated  
17  
18  
19 effectiveness and costs will be compared between the intervention and control group.  
20  
21  
22  
23  
24

### 25 **Data monitoring and auditing**

26  
27  
28 Because the iCBT program is not regarded as an invasive intervention, it is not necessary to  
29  
30  
31 set up a data monitoring board or to complete auditing in this trial.  
32  
33

### 34 **Data availability**

35  
36  
37 Deidentified individual participant data will be available upon reasonable request after  
38  
39  
40 publication of the main analysis paper. Contact information is the email address of the corresponding  
41  
42  
43 author.  
44  
45  
46  
47  
48

### 49 **Patient and public involvement**

50  
51  
52 We utilized the function of the app “Luna Luna Baby” that allows users (pregnant women)  
53  
54  
55 to talk to each other about their problems. We extracted essential topics that pregnant women are  
56  
57  
58 concerned about based on 6393 text data, and developed programs for those topics. The topics were  
59  
60

1  
2  
3  
4 extracted by using a machine learning approach, based on the Latent Dirichlet Allocation (LDA).[50]  
5  
6

7 In this approach, morphological analysis was conducted for the text data from the pregnant women,  
8  
9  
10 and nouns and adjectives about what they suffer were collected. The LDA model was implemented  
11  
12  
13 by Scikit-learn version 0.21.3 (1) in Python. As a result, five topics were extracted: relationship with  
14  
15  
16 partners, concern about weight gain, concern about pregnancy checkup, physical symptoms such as  
17  
18  
19 pain, and dysfunction due to morning sickness. Since pregnancy checkup is considered to be a matter  
20  
21  
22 of obstetrics, each module of the iCBT program has been developed to deal with the remaining 4  
23  
24  
25 topics, namely, module 1, 2 and 4 focus on dysfunction due to morning sickness, module 3 on  
26  
27  
28 concern about weight gain, module 5 on physical symptoms, and module 6 on relationship with  
29  
30  
31 partners. We will not access this chatroom during the RCT.  
32  
33

34 In addition, three women who had experiences of pregnancy and childbirth (two researchers  
35  
36  
37 and an ordinary mother) were invited to make comments on the intervention programs based on their  
38  
39  
40 experiences and preferences. Two researchers above (EO, NS) also were involved in designing this  
41  
42  
43 protocol.  
44  
45  
46  
47  
48

## 49 **Ethics and dissemination**

### 51 52 **Ethical and safety considerations**

53  
54  
55 Informed consent for the app will be obtained from all participants included in this study  
56  
57  
58 after full explanation of the study. Candidates will be informed that their participation is voluntary,  
59  
60

1  
2  
3  
4 and that even after voluntarily participating, they can withdraw from the study at any time and their  
5  
6  
7 withdrawal will cause no disadvantage to them. We expect no adverse health effects from this  
8  
9  
10 intervention, except possible deterioration in depressive symptoms. The principal investigators will  
11  
12  
13 communicate important protocol modification with the institutional review board.  
14  
15

### 16 **Data confidentiality**

17  
18  
19 The collected data will be stored as linkable anonymizing data. The principal investigator  
20  
21  
22 will have access to the final dataset after the trial and take responsibility for the integrity of the data  
23  
24  
25 and the accuracy of analysis.  
26  
27

### 28 **Dissemination of research findings**

29  
30  
31 The findings of this study will be disseminated through publications in peer-reviewed  
32  
33  
34 international journals. Presentations of the findings will also be offered at relevant research  
35  
36  
37 conferences, and local academic symposia and seminars. The principal investigator will be listed as  
38  
39  
40 corresponding authors, and the authorship eligibility will be conformed to the International  
41  
42  
43 Committee of Medical Journal Editors. If the intervention programs are found to be significantly  
44  
45  
46 positively effective, the programs can be made available for all users of the app in the future.  
47  
48  
49  
50

### 51 **Discussion**

52  
53  
54 The greatest strength of this study is to prove the effectiveness of the fully automated  
55  
56  
57 smartphone-based CBT program on preventing both antenatal and postpartum depression. The  
58  
59  
60 relatively short, newly developed programs for pregnant women would be practical and low dropout



1  
2  
3  
4 is expected. Furthermore, this study will assess diagnosis of MDE using CIDI. Many previous studies  
5  
6  
7 using iCBT have suggested its preventive effect on depression; however, no previous studies assessed  
8  
9  
10 the diagnosis of perinatal depression using the structural interview. This RCT with large sample size  
11  
12  
13 can lead to a definitive result.

14  
15  
16 This study also will evaluate implementation outcomes of the program. Previous studies using  
17  
18  
19 iCBT have assessed the satisfaction with their program; however, few studies evaluated  
20  
21  
22 implementation outcomes including acceptability, adoption, appropriateness, feasibility, fidelity,  
23  
24  
25 implementation cost, penetration, and sustainability.[43] This study will contribute to the  
26  
27  
28 dissemination and implementation of iCBT in the future.

29  
30  
31 Another strength of this study is to add evidence of maternity blues. Maternity blues is highly  
32  
33  
34 prevalent, and it can present a range of symptoms such as intense short-lasting dysphoric mood,  
35  
36  
37 irritability, anxiety, sleep disturbance, and poor concentration within the first week following  
38  
39  
40 childbirth.[52] Maternity blues could lead to postpartum depression,[53] but to our knowledge, no  
41  
42  
43 previous studies have shown a preventive strategy to deal with maternity blues. This RCT will clarify  
44  
45  
46 whether iCBT during pregnancy can prevent maternity blues.

47  
48  
49 This study has several limitations. First, all outcomes will be measured by self-report, which  
50  
51  
52 could be affected by the perceptions of the participants. Second, users of the app are not regarded as  
53  
54  
55 representative of all pregnant women, though approximately 1 in 4 pregnant women in Japan are  
56  
57  
58 thought to use the app. Therefore, the findings of this study can not necessarily be generalizable.

1  
2  
3  
4  
5  
6  
7  
8  
9  
10  
11  
12  
13  
14  
15  
16  
17  
18  
19  
20  
21  
22  
23  
24  
25  
26  
27  
28  
29  
30  
31  
32  
33  
34  
35  
36  
37  
38  
39  
40  
41  
42  
43  
44  
45  
46  
47  
48  
49  
50  
51  
52  
53  
54  
55  
56  
57  
58  
59  
60

For peer review only

1  
2  
3  
4 **Author contributions** DN conceived and designed the study. DN, KI, EO, NS, and YS contributed  
5  
6 creating programs. KW calculated sample size and developed analysis plan. DN wrote the first draft  
7  
8 of the manuscript, and all other authors revised the manuscript critically. All authors approved the final  
9  
10 version of the manuscript.  
11

12  
13 **Funding** This work was supported by Japan Society for the Promotion of Science under a Grant-in-  
14  
15 Aid for Scientific Research (A) (19H01073 to DN)  
16

17  
18 **Disclaimer** The funder had no role in study design, data collection and analysis, decision to publish  
19  
20 or preparation of the manuscript.  
21

22  
23 **Competing interests** MTI Ltd. has been involved in this study as mentioned in the manuscript. NK  
24  
25 reports grants from Infocom Corp, Fujitsu Ltd, Fujitsu Software Technologies and TAK Ltd; personal  
26  
27 fees from Occupational Health Foundation, Japan Dental Association, Sekisui Chemicals, Junpukai  
28  
29 Health Care Center, Osaka Chamber of Commerce and Industry, outside the submitted work.  
30

31 **Patient consent for publication** Obtained.  
32

33  
34 **Ethics approval** The study plan was approved by the Research Ethics Review Board of Graduate  
35  
36 School of Medicine/Faculty of Medicine, the University of Tokyo (2019150NI).  
37  
38  
39  
40  
41

42 **Figure legend:**  
43

44 Figure 1 Flow diagram of study participants  
45  
46  
47  
48  
49  
50  
51  
52  
53  
54  
55  
56  
57  
58  
59  
60

## References

1. Wisner KL, Miller ES, Tandon D. Attention to prevention-can we stop perinatal depression before it starts? *JAMA Psychiatry* 2019;76(4):355-6.
2. Bennett HA, Einarson A, Taddio A, et al. Prevalence of depression during pregnancy: systematic review. *Obstet Gynecol* 2004;103(4):698-709.
3. Hahn-Holbrook J, Cornwell-Hinrichs T, Anaya I. Economic and health Predictors of national postpartum depression prevalence: a systematic review, meta-analysis, and meta-Regression of 291 studies from 56 countries. *Front Psychiatry* 2017;8:248.
4. Takehara K, Suto M, Kakee N, et al. Prenatal and early postnatal depression and child maltreatment among Japanese fathers. *Child Abuse Negl* 2017;70:231-9.
5. Davis EP, Glynn LM, Schetter CD, et al. Prenatal exposure to maternal depression and cortisol influences infant temperament. *J Am Acad Child Adolesc Psychiatry* 2007;46(6):737-46.
6. Leech SL, Larkby CA, Day R, et al. Predictors and correlates of high levels of depression and anxiety symptoms among children at age 10. *J Am Acad Child Adolesc Psychiatry* 2006;45(2):223-30.
7. Field T, Diego M, Hernandez-Reif M. Prenatal depression effects on the fetus and newborn: a review. *Infant Behav Dev* 2006;29(3):445-55.
8. Diego MA, Field T, Hernandez-Reif M, et al. Prenatal depression restricts fetal growth. *Early Hum Dev* 2009;85(1):65-70.
9. Stein A, Pearson RM, Goodman SH, et al. Effects of perinatal mental disorders on the fetus and child. *Lancet* 2014;384(9956):1800-19.
10. Underwood L, Waldie KE, Peterson E, et al. Paternal depression symptoms during pregnancy and after childbirth among participants in the Growing Up in New Zealand Study. *JAMA Psychiatry* 2017;74(4):360-9.
11. Lancaster CA, Gold KJ, Flynn HA, et al. Risk factors for depressive symptoms during pregnancy: a systematic review. *Am J Obstet Gynecol* 2010;202(1):5-14.
12. Force USPST, Curry SJ, Krist AH, et al. Interventions to prevent perinatal depression: US Preventive Services Task Force recommendation statement. *JAMA* 2019;321(6):580-7.
13. Sockol LE. A systematic review of the efficacy of cognitive behavioral therapy for treating and preventing perinatal depression. *Journal of Affective Disorders* 2015;177:7-21.
14. Sockol LE. A systematic review and meta-analysis of interpersonal psychotherapy for perinatal women. *Journal of Affective Disorders* 2018;232:316-28.
15. Sockol LE, Epperson CN, Barber JP. Preventing postpartum depression: a meta-analytic review. *Clin Psychol Rev* 2013;33(8):1205-17.
16. Fairburn CG, Patel V. The impact of digital technology on psychological treatments and their dissemination. *Behav Res Ther* 2017;88:19-25.
17. Loughnan SA, Joubert AE, Grierson A, et al. Internet-delivered psychological interventions for clinical anxiety and depression in perinatal women: a systematic review and meta-analysis. *Arch Womens Ment Health* 2019;22(6):737-50.

18. Barrera AZ, Wickham RE, Munoz RF. Online prevention of postpartum depression for Spanish- and English-speaking pregnant women: a pilot randomized controlled trial. *Internet Interv* 2015;2(3):257-65.
19. Haga SM, Drozd F, Lisoy C, et al. Mamma mia - a randomized controlled trial of an internet-based intervention for perinatal depression. *Psychological medicine* 2019;49(11):1850-8.
20. Chan AW, Tetzlaff JM, Gøtzsche PC, et al. SPIRIT 2013 explanation and elaboration: guidance for protocols of clinical trials. *BMJ* 2013;346:e7586.
21. Kessler RC, Ustun TB. The World Mental Health (WMH) Survey Initiative Version of the World Health Organization (WHO) Composite International Diagnostic Interview (CIDI). *Int J Methods Psychiatr Res* 2004;13(2):93-121.
22. Imamura K, Kawakami N, Furukawa TA, et al. Does internet-based cognitive behavioral therapy (iCBT) prevent major depressive episode for workers? A 12-month follow-up of a randomized controlled trial. *Psychological medicine* 2015;45(9):1907-17.
23. Padesky CA, Greenberger D. Clinician's Guide to Mind over Mood. New York: Guilford Press 1995.
24. Cassar J, Ross J, Dahne J, et al. Therapist tips for the brief behavioural activation therapy for depression - revised (BATD-R) treatment manual practical wisdom and clinical nuance. *Clin Psychol (Aust Psychol Soc)* 2016;20(1):46-53.
25. Hayes SC, Stroschl K, Wilson KG. Acceptance and Commitment Therapy: An Experiential Approach to Behavior Change. New York: Guilford Press 1999.
26. Gilbert P. The Compassionate Mind: A New Approach to Life's Challenges. Oakland: Constable & Robinson 2009.
27. Zessin U, Dickhauser O, Garbade S. The relationship between self-compassion and well-being: a meta-analysis. *Appl Psychol Health Well Being* 2015;7(3):340-64.
28. Kabat-Zinn J. Wherever You Go, There You Are: Mindfulness Meditation in Everyday Life. New York: Hyperion Books 1994.
29. D'Zurilla TJ, Goldfried MR. Problem solving and behavior modification. *J Abnorm Psychol* 1971;78(1):107-26.
30. Kessler RC, Andrews G, Colpe LJ, et al. Short screening scales to monitor population prevalences and trends in non-specific psychological distress. *Psychological medicine* 2002;32(6):959-76.
31. Furukawa TA, Kawakami N, Saitoh M, et al. The performance of the Japanese version of the K6 and K10 in the World Mental Health Survey Japan. *Int J Methods Psychiatr Res* 2008;17(3):152-8.
32. Herdman M, Gudex C, Lloyd et al. Development and preliminary testing of the new five-level version of EQ-5D (EQ-5D-5L). *Qual Life Res* 2011;20(10):1727-36.
33. van Hout B, Janssen MF, Feng YS, et al. Interim scoring for the EQ-5D-5L: mapping the EQ-5D-5L to EQ-5D-3L value sets. *Value Health* 2012;15(5):708-15.
34. Ikeda S, Shirowa T, Igarashi A, et al. Developing a Japanese version of the EQ-5D-5L value set. *Journal of the National Institute of Public Health* 2015;64(1):47-55.
35. Gierk B, Kohlmann S, Kroenke K, et al. The somatic symptom scale-8 (SSS-8): a brief measure of somatic symptom burden. *JAMA Intern Med* 2014;174(3):399-407.
36. Matsudaira K, Oka H, Kawaguchi M, et al. Development of a Japanese version of the Somatic Symptom Scale-8: psychometric validity and internal consistency. *Gen Hosp Psychiatry* 2017;45:7-11.

- 1  
2  
3  
4 37. Nishi D, Uehara R, Yoshikawa E, et al. Culturally sensitive and universal measure of resilience for Japanese  
5 populations: Tachikawa Resilience Scale in comparison with Resilience Scale 14-item version. *Psychiatry and Clinical*  
6 *Neurosciences* 2013;67(3):174-81.
- 7  
8 38. Bastien CH, Vallieres A, Morin CM. Validation of the Insomnia Severity Index as an outcome measure for  
9 insomnia research. *Sleep Med* 2001;2(4):297-307.
- 10  
11 39. Munezawa T, Morin CM, Inoue Y, et al. Development of the Japanese version of the Insomnia Severity Index  
12 (ISI-J) *Seishinkachiryogaku* 2009;24(2):219-25.
- 13  
14 40. Allen RP, Burchell BJ, MacDonald B, et al. Validation of the self-completed Cambridge-Hopkins questionnaire  
15 (CH-RLSq) for ascertainment of restless legs syndrome (RLS) in a population survey. *Sleep Med* 2009;10(10):1097-100.
- 16  
17 41. Kondo H, Okada M, Eto H, et al. Development of Cambridge-Hopkins Questionnaire 13 Japanese version short  
18 form (CH-RLSq13) version 2.1 in the assessment of restless legs syndrome (in Japanese). *Suiminiryō* 2016;10:577-84.
- 19  
20 42. Yoshida H, Yamanaka T, Khono G, et al. The study for the development of maternal anxiety scales-1: models  
21 for mothers rearing 4 · 5 month-old and 10 · 11 month-old infants. *Syonihokenkenkyū* 2013;72(5):680-9.
- 22  
23 43. Proctor E, Silmere H, Raghavan R, et al. Outcomes for implementation research: conceptual distinctions,  
24 measurement challenges, and research agenda. *Adm Policy Ment Health* 2011;38(2):65-76.
- 25  
26 44. Lewis CC, Fischer S, Weiner BJ, et al. Outcomes for implementation science: an enhanced systematic review  
27 of instruments using evidence-based rating criteria. *Implement Sci* 2015;10:155.
- 28  
29 45. Weiner BJ, Lewis CC, Stanick C, et al. Psychometric assessment of three newly developed implementation  
30 outcome measures. *Implement Sci* 2017;12(1):108.
- 31  
32 46. Cuijpers P, van Straten A, Smit F, et al. Preventing the onset of depressive disorders: a meta-analytic review of  
33 psychological interventions. *Am J Psychiatry* 2008;165(10):1272-80.
- 34  
35 47. Robins JM, Finkelstein DM. Correcting for noncompliance and dependent censoring in an AIDS clinical trial  
36 with inverse probability of censoring weighted (IPCW) log-rank tests. *Biometrics* 2000;56(3):779-88.
- 37  
38 48. Richards DA, Ekers D, McMillan D, et al. Cost and outcome of behavioural activation versus cognitive  
39 behavioural therapy for depression (COBRA): a randomised, controlled, non-inferiority trial. *Lancet*  
40 2016;388(10047):871-80.
- 41  
42 49. Ministry of Health WaL. Survey of Medical Care Activities in Public Health Insurance in 2016 (in Japanese)  
43 [Available from: <https://www.mhlw.go.jp/toukei/saikin/hw/sinryo/tyosa16/>]
- 44  
45 50. Blei DM, Ng AY, Jordan MI. Latent dirichlet allocation. *Journal of Machine Learning Research* 2003:993-  
46 1022.
- 47  
48 51. Scikit-learn. [Available from: [https://scikit-](https://scikit-learn.org/stable/modules/generated/sklearn.decomposition.LatentDirichletAllocation.html)  
49 [learn.org/stable/modules/generated/sklearn.decomposition.LatentDirichletAllocation.html](https://scikit-learn.org/stable/modules/generated/sklearn.decomposition.LatentDirichletAllocation.html)].
- 50  
51 52. Kennerley H, Gath D. Maternity blues. I. detection and measurement by questionnaire. *Br J Psychiatry*  
52 1989;155:356-62.
- 53  
54 53. Hannah P, Adams D, Lee A, et al. Links between early post-partum mood and post-natal depression. *Br J*  
55 *Psychiatry* 1992;160:777-80.
- 56  
57  
58  
59  
60

**Table 1** Contents of internet cognitive behavioral therapy program

| <b>Module No</b> | <b>Techniques for stress management</b>              |
|------------------|------------------------------------------------------|
| Module 1         | Psychoeducation                                      |
| Module 2         | Case formulation based on cognitive behavioral model |
| Module 3         | Behavioral activation                                |
| Module 4         | Self-compassion                                      |
| Module 5         | Mindfulness                                          |
| Module 6         | Problem solving                                      |

For peer review only

**Table 2** Overview of measurements

| Measurement                                    | Aim                                   | Baseline<br>(T1) | 32 weeks<br>gestation<br>(T2) | 34 weeks<br>gestation<br>(T3) | 1 week<br>postpartum<br>(T4) | 3 months<br>postpartum<br>(T5) |
|------------------------------------------------|---------------------------------------|------------------|-------------------------------|-------------------------------|------------------------------|--------------------------------|
| <i>Primary outcomes</i>                        |                                       |                  |                               |                               |                              |                                |
| CIDI                                           | Diagnosis of Major Depressive Episode | ✓                | ✓                             |                               |                              | ✓                              |
| <i>Secondary outcomes</i>                      |                                       |                  |                               |                               |                              |                                |
| EPDS                                           | Depressive symptoms                   | ✓                | ✓                             |                               | ✓                            | ✓                              |
| K6                                             | Psychological distress                | ✓                | ✓                             |                               | ✓                            | ✓                              |
| ED-5D-5L                                       | Quality of life                       | ✓                | ✓                             |                               |                              | ✓                              |
| SSS-8                                          | Somatic symptoms                      | ✓                | ✓                             |                               |                              | ✓                              |
| TRS                                            | Resilience                            | ✓                | ✓                             |                               |                              | ✓                              |
| ISI                                            | Insomnia                              | ✓                | ✓                             |                               |                              | ✓                              |
| CH-RLSq13                                      | Restless legs syndrome                | ✓                | ✓                             |                               |                              | ✓                              |
| Maternal Anxiety Scale for 4-5 months children | Maternal anxiety                      |                  |                               |                               |                              | ✓                              |
| Medical costs                                  | Medical service use                   | ✓                | ✓                             |                               |                              | ✓                              |
| Implementation and satisfaction                | Implementation outcomes               |                  |                               | ✓                             |                              |                                |
| Adverse effects                                | Physical and mental symptoms          |                  |                               | ✓                             |                              |                                |
| <i>Baseline assessments</i>                    |                                       |                  |                               |                               |                              |                                |
| Demographics                                   |                                       | ✓                |                               |                               |                              |                                |
| VAWS                                           |                                       | ✓                |                               |                               |                              |                                |

CIDI, World Health Organization Composite International Diagnostic Interview 3.0; EPDS, The Edinburgh Postnatal Depression Scale; K6, Kessler's Psychological Distress Scale; ED-5D-5L, EuroQol -5 dimension-5 level; SSS-8, Somatic symptom Scale-8; TRS, Tachikawa Resilience Scale; ISI, The Insomnia Severity Index; CH-RLSq13, Cambridge-Hopkins questionnaire short form; VAWS, Violence Against Women Screen



(Consent form in Japanese)

同 意 書

東京大学医学系研究科長・医学部長 殿

研究課題「全自動化インターネット認知行動療法による妊娠うつ病・産後うつ病の予防」  
(審査番号\*\*\*\*)

私は、上記研究への参加にあたり、下記の説明文書の記載事項について説明を受け、これを十分理解しましたので本研究の研究対象者となることに同意いたします。

- 1、この研究の概要
- 2、研究参加の任意性と撤回の自由
- 3、個人情報の保護
- 4、研究結果の公表・開示
- 5、研究対象者にもたらされる利益及び不利益
- 6、研究終了後の資料（試料）等の取扱方針
- 7、あなたの費用負担
- 8、研究から生じる知的財産権の帰属
- 9、その他

また、私に関わるデータは、将来、新たに計画・実施される研究のために、長期間の保存と研究への使用に同意いたします。

はい

いいえ

※同意の日付及び同意した人のIDはデータとして取得する。

Figure 1

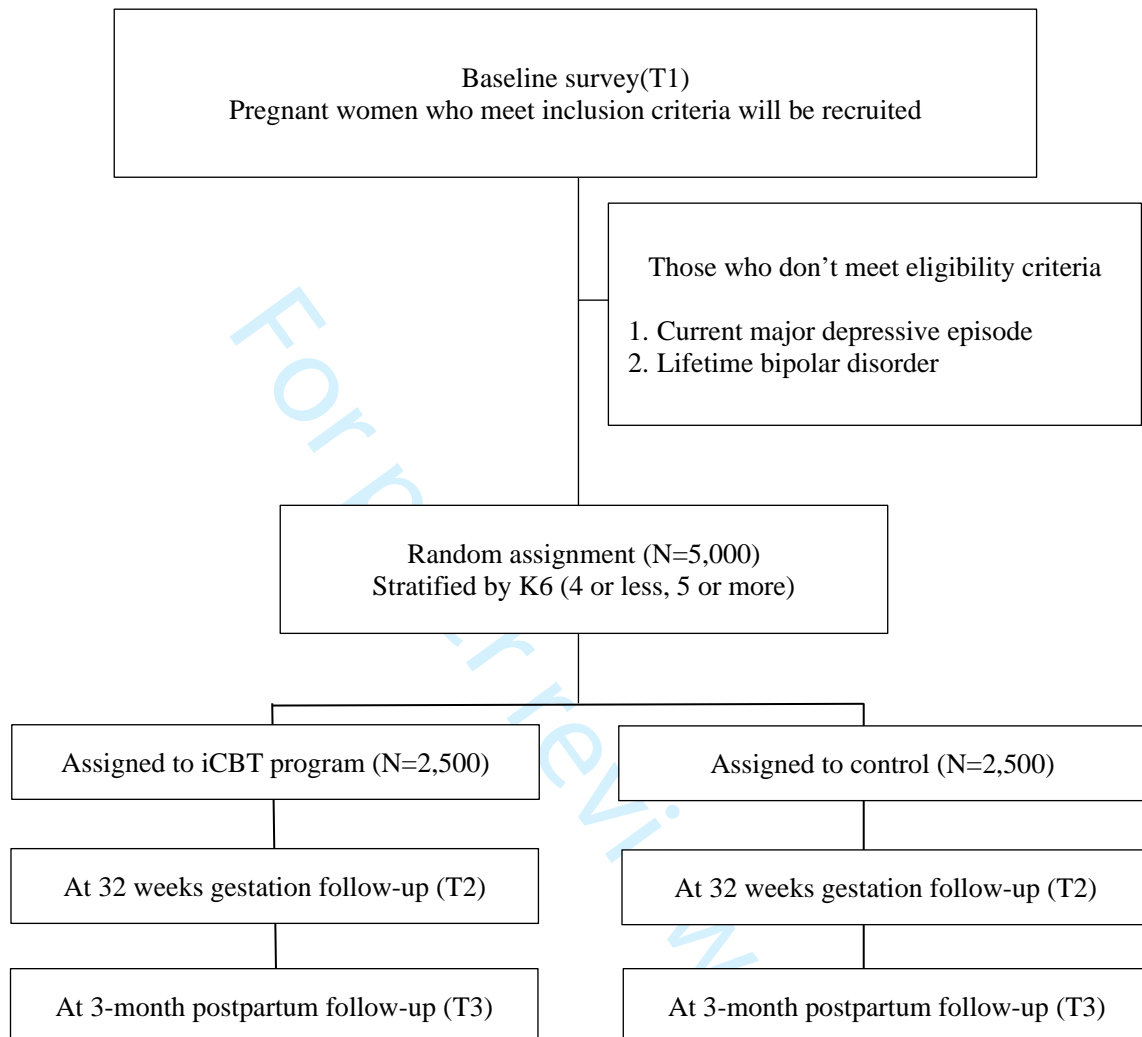

# Reporting checklist for protocol of a clinical trial.

Based on the SPIRIT guidelines.

## Instructions to authors

Complete this checklist by entering the page numbers from your manuscript where readers will find each of the items listed below.

Your article may not currently address all the items on the checklist. Please modify your text to include the missing information. If you are certain that an item does not apply, please write "n/a" and provide a short explanation.

Upload your completed checklist as an extra file when you submit to a journal.

In your methods section, say that you used the SPIRIT reporting guidelines, and cite them as:

Chan A-W, Tetzlaff JM, Altman DG, Laupacis A, Gøtzsche PC, Krleža-Jerić K, Hróbjartsson A, Mann H, Dickersin K, Berlin J, Doré C, Parulekar W, Summerskill W, Groves T, Schulz K, Sox H, Rockhold FW, Rennie D, Moher D. SPIRIT 2013 Statement: Defining standard protocol items for clinical trials. *Ann Intern Med.* 2013;158(3):200-207

|                                   |                                                                                                                                 |  | Page   |
|-----------------------------------|---------------------------------------------------------------------------------------------------------------------------------|--|--------|
|                                   | Reporting Item                                                                                                                  |  | Number |
| <b>Administrative information</b> |                                                                                                                                 |  |        |
| Title                             | <a href="#">#1</a> Descriptive title identifying the study design, population, interventions, and, if applicable, trial acronym |  | 1      |

|    |                     |                     |                                                            |    |
|----|---------------------|---------------------|------------------------------------------------------------|----|
| 1  | Trial registration  | <a href="#">#2a</a> | Trial identifier and registry name. If not yet registered, | 2  |
| 2  |                     |                     | name of intended registry                                  |    |
| 3  |                     |                     |                                                            |    |
| 4  |                     |                     |                                                            |    |
| 5  |                     |                     |                                                            |    |
| 6  | Trial registration: | <a href="#">#2b</a> | All items from the World Health Organization Trial         | NA |
| 7  | data set            |                     | Registration Data Set                                      |    |
| 8  |                     |                     |                                                            |    |
| 9  |                     |                     |                                                            |    |
| 10 |                     |                     |                                                            |    |
| 11 | Protocol version    | <a href="#">#3</a>  | Date and version identifier                                | 2  |
| 12 |                     |                     |                                                            |    |
| 13 |                     |                     |                                                            |    |
| 14 |                     |                     |                                                            |    |
| 15 | Funding             | <a href="#">#4</a>  | Sources and types of financial, material, and other        | 23 |
| 16 |                     |                     | support                                                    |    |
| 17 |                     |                     |                                                            |    |
| 18 |                     |                     |                                                            |    |
| 19 |                     |                     |                                                            |    |
| 20 | Roles and           | <a href="#">#5a</a> | Names, affiliations, and roles of protocol contributors    | 23 |
| 21 | responsibilities:   |                     |                                                            |    |
| 22 |                     |                     |                                                            |    |
| 23 | contributorship     |                     |                                                            |    |
| 24 |                     |                     |                                                            |    |
| 25 |                     |                     |                                                            |    |
| 26 |                     |                     |                                                            |    |
| 27 |                     |                     |                                                            |    |
| 28 | Roles and           | <a href="#">#5b</a> | Name and contact information for the trial sponsor         | NA |
| 29 | responsibilities:   |                     |                                                            |    |
| 30 |                     |                     |                                                            |    |
| 31 | sponsor contact     |                     |                                                            |    |
| 32 |                     |                     |                                                            |    |
| 33 | information         |                     |                                                            |    |
| 34 |                     |                     |                                                            |    |
| 35 |                     |                     |                                                            |    |
| 36 |                     |                     |                                                            |    |
| 37 |                     |                     |                                                            |    |
| 38 | Roles and           | <a href="#">#5c</a> | Role of study sponsor and funders, if any, in study        | NA |
| 39 | responsibilities:   |                     | design; collection, management, analysis, and              |    |
| 40 |                     |                     | interpretation of data; writing of the report; and the     |    |
| 41 | sponsor and funder  |                     | decision to submit the report for publication, including   |    |
| 42 |                     |                     | whether they will have ultimate authority over any of      |    |
| 43 |                     |                     | these activities                                           |    |
| 44 |                     |                     |                                                            |    |
| 45 |                     |                     |                                                            |    |
| 46 |                     |                     |                                                            |    |
| 47 |                     |                     |                                                            |    |
| 48 |                     |                     |                                                            |    |
| 49 |                     |                     |                                                            |    |
| 50 |                     |                     |                                                            |    |
| 51 |                     |                     |                                                            |    |
| 52 | Roles and           | <a href="#">#5d</a> | Composition, roles, and responsibilities of the            | NA |
| 53 | responsibilities:   |                     | coordinating centre, steering committee, endpoint          |    |
| 54 |                     |                     | adjudication committee, data management team, and          |    |
| 55 | committees          |                     |                                                            |    |
| 56 |                     |                     |                                                            |    |
| 57 |                     |                     |                                                            |    |
| 58 |                     |                     |                                                            |    |
| 59 |                     |                     |                                                            |    |
| 60 |                     |                     |                                                            |    |

other individuals or groups overseeing the trial, if applicable (see Item 21a for data monitoring committee)

## Introduction

|                                                  |                     |                                                                                                                                                                                                            |     |
|--------------------------------------------------|---------------------|------------------------------------------------------------------------------------------------------------------------------------------------------------------------------------------------------------|-----|
| Background and rationale                         | <a href="#">#6a</a> | Description of research question and justification for undertaking the trial, including summary of relevant studies (published and unpublished) examining benefits and harms for each intervention         | 4-5 |
| Background and rationale: choice of comparators  | <a href="#">#6b</a> | Explanation for choice of comparators                                                                                                                                                                      | 4-5 |
| Objectives                                       | <a href="#">#7</a>  | Specific objectives or hypotheses                                                                                                                                                                          | 5   |
| Trial design                                     | <a href="#">#8</a>  | Description of trial design including type of trial (eg, parallel group, crossover, factorial, single group), allocation ratio, and framework (eg, superiority, equivalence, non-inferiority, exploratory) | 5   |
| <b>Methods:</b>                                  |                     |                                                                                                                                                                                                            |     |
| <b>Participants, interventions, and outcomes</b> |                     |                                                                                                                                                                                                            |     |
| Study setting                                    | <a href="#">#9</a>  | Description of study settings (eg, community clinic, academic hospital) and list of countries where data will be collected. Reference to where list of study sites can be obtained                         | 5   |

|                                                                                                                      |                                    |                      |                                                                                                                                                                                                                                                                                                                                                                                |       |
|----------------------------------------------------------------------------------------------------------------------|------------------------------------|----------------------|--------------------------------------------------------------------------------------------------------------------------------------------------------------------------------------------------------------------------------------------------------------------------------------------------------------------------------------------------------------------------------|-------|
| 1<br>2<br>3<br>4<br>5<br>6<br>7<br>8<br>9<br>10                                                                      | Eligibility criteria               | <a href="#">#10</a>  | Inclusion and exclusion criteria for participants. If applicable, eligibility criteria for study centres and individuals who will perform the interventions (eg, surgeons, psychotherapists)                                                                                                                                                                                   | 6     |
| 11<br>12<br>13<br>14<br>15<br>16<br>17<br>18                                                                         | Interventions:<br>description      | <a href="#">#11a</a> | Interventions for each group with sufficient detail to allow replication, including how and when they will be administered                                                                                                                                                                                                                                                     | 7-10  |
| 19<br>20<br>21<br>22<br>23<br>24<br>25<br>26<br>27                                                                   | Interventions:<br>modifications    | <a href="#">#11b</a> | Criteria for discontinuing or modifying allocated interventions for a given trial participant (eg, drug dose change in response to harms, participant request, or improving / worsening disease)                                                                                                                                                                               | NA    |
| 28<br>29<br>30<br>31<br>32<br>33<br>34<br>35                                                                         | Interventions:<br>adherence        | <a href="#">#11c</a> | Strategies to improve adherence to intervention protocols, and any procedures for monitoring adherence (eg, drug tablet return; laboratory tests)                                                                                                                                                                                                                              | 14    |
| 36<br>37<br>38<br>39<br>40                                                                                           | Interventions:<br>concomitant care | <a href="#">#11d</a> | Relevant concomitant care and interventions that are permitted or prohibited during the trial                                                                                                                                                                                                                                                                                  | NA    |
| 41<br>42<br>43<br>44<br>45<br>46<br>47<br>48<br>49<br>50<br>51<br>52<br>53<br>54<br>55<br>56<br>57<br>58<br>59<br>60 | Outcomes                           | <a href="#">#12</a>  | Primary, secondary, and other outcomes, including the specific measurement variable (eg, systolic blood pressure), analysis metric (eg, change from baseline, final value, time to event), method of aggregation (eg, median, proportion), and time point for each outcome. Explanation of the clinical relevance of chosen efficacy and harm outcomes is strongly recommended | 10-14 |

|    |                           |                      |                                                            |     |
|----|---------------------------|----------------------|------------------------------------------------------------|-----|
| 1  | Participant timeline      | <a href="#">#13</a>  | Time schedule of enrolment, interventions (including any   | 6-7 |
| 2  |                           |                      | run-ins and washouts), assessments, and visits for         |     |
| 3  |                           |                      | participants. A schematic diagram is highly recommended    |     |
| 4  |                           |                      | (see Figure)                                               |     |
| 5  |                           |                      |                                                            |     |
| 6  |                           |                      |                                                            |     |
| 7  |                           |                      |                                                            |     |
| 8  |                           |                      |                                                            |     |
| 9  |                           |                      |                                                            |     |
| 10 |                           |                      |                                                            |     |
| 11 | Sample size               | <a href="#">#14</a>  | Estimated number of participants needed to achieve         | 15  |
| 12 |                           |                      | study objectives and how it was determined, including      |     |
| 13 |                           |                      | clinical and statistical assumptions supporting any sample |     |
| 14 |                           |                      | size calculations                                          |     |
| 15 |                           |                      |                                                            |     |
| 16 |                           |                      |                                                            |     |
| 17 |                           |                      |                                                            |     |
| 18 |                           |                      |                                                            |     |
| 19 |                           |                      |                                                            |     |
| 20 |                           |                      |                                                            |     |
| 21 | Recruitment               | <a href="#">#15</a>  | Strategies for achieving adequate participant enrolment to | 6-7 |
| 22 |                           |                      | reach target sample size                                   |     |
| 23 |                           |                      |                                                            |     |
| 24 |                           |                      |                                                            |     |
| 25 |                           |                      |                                                            |     |
| 26 | <b>Methods:</b>           |                      |                                                            |     |
| 27 |                           |                      |                                                            |     |
| 28 | <b>Assignment of</b>      |                      |                                                            |     |
| 29 | <b>interventions (for</b> |                      |                                                            |     |
| 30 | <b>controlled trials)</b> |                      |                                                            |     |
| 31 |                           |                      |                                                            |     |
| 32 |                           |                      |                                                            |     |
| 33 |                           |                      |                                                            |     |
| 34 |                           |                      |                                                            |     |
| 35 |                           |                      |                                                            |     |
| 36 | Allocation: sequence      | <a href="#">#16a</a> | Method of generating the allocation sequence (eg,          | 16  |
| 37 | generation                |                      | computer-generated random numbers), and list of any        |     |
| 38 |                           |                      | factors for stratification. To reduce predictability of a  |     |
| 39 |                           |                      | random sequence, details of any planned restriction (eg,   |     |
| 40 |                           |                      | blocking) should be provided in a separate document that   |     |
| 41 |                           |                      | is unavailable to those who enrol participants or assign   |     |
| 42 |                           |                      | interventions                                              |     |
| 43 |                           |                      |                                                            |     |
| 44 |                           |                      |                                                            |     |
| 45 |                           |                      |                                                            |     |
| 46 |                           |                      |                                                            |     |
| 47 |                           |                      |                                                            |     |
| 48 |                           |                      |                                                            |     |
| 49 |                           |                      |                                                            |     |
| 50 |                           |                      |                                                            |     |
| 51 |                           |                      |                                                            |     |
| 52 |                           |                      |                                                            |     |
| 53 | Allocation                | <a href="#">#16b</a> | Mechanism of implementing the allocation sequence (eg,     | 16  |
| 54 | concealment               |                      | central telephone; sequentially numbered, opaque,          |     |
| 55 |                           |                      |                                                            |     |
| 56 |                           |                      |                                                            |     |
| 57 |                           |                      |                                                            |     |
| 58 | mechanism                 |                      |                                                            |     |
| 59 |                           |                      |                                                            |     |
| 60 |                           |                      |                                                            |     |

sealed envelopes), describing any steps to conceal the sequence until interventions are assigned

Allocation: [#16c](#) Who will generate the allocation sequence, who will enrol participants, and who will assign participants to interventions 16

Blinding (masking) [#17a](#) Who will be blinded after assignment to interventions (eg, trial participants, care providers, outcome assessors, data analysts), and how 16

Blinding (masking): [#17b](#) If blinded, circumstances under which unblinding is permissible, and procedure for revealing a participant's allocated intervention during the trial NA

**Methods: Data collection, management, and analysis**

Data collection plan [#18a](#) Plans for assessment and collection of outcome, baseline, and other trial data, including any related processes to promote data quality (eg, duplicate measurements, training of assessors) and a description of study instruments (eg, questionnaires, laboratory tests) along with their reliability and validity, if known. Reference to where data collection forms can be found, if not in the protocol 7



|    |                            |                      |                                                                |       |
|----|----------------------------|----------------------|----------------------------------------------------------------|-------|
| 1  | Data collection plan:      | <a href="#">#18b</a> | Plans to promote participant retention and complete            | 7     |
| 2  |                            |                      |                                                                |       |
| 3  | retention                  |                      | follow-up, including list of any outcome data to be            |       |
| 4  |                            |                      | collected for participants who discontinue or deviate from     |       |
| 5  |                            |                      | intervention protocols                                         |       |
| 6  |                            |                      |                                                                |       |
| 7  |                            |                      |                                                                |       |
| 8  |                            |                      |                                                                |       |
| 9  |                            |                      |                                                                |       |
| 10 |                            |                      |                                                                |       |
| 11 | Data management            | <a href="#">#19</a>  | Plans for data entry, coding, security, and storage,           | 15    |
| 12 |                            |                      | including any related processes to promote data quality        |       |
| 13 |                            |                      | (eg, double data entry; range checks for data values).         |       |
| 14 |                            |                      | Reference to where details of data management                  |       |
| 15 |                            |                      | procedures can be found, if not in the protocol                |       |
| 16 |                            |                      |                                                                |       |
| 17 |                            |                      |                                                                |       |
| 18 |                            |                      |                                                                |       |
| 19 |                            |                      |                                                                |       |
| 20 |                            |                      |                                                                |       |
| 21 |                            |                      |                                                                |       |
| 22 |                            |                      |                                                                |       |
| 23 | Statistics: outcomes       | <a href="#">#20a</a> | Statistical methods for analysing primary and secondary        | 16-17 |
| 24 |                            |                      | outcomes. Reference to where other details of the              |       |
| 25 |                            |                      | statistical analysis plan can be found, if not in the protocol |       |
| 26 |                            |                      |                                                                |       |
| 27 |                            |                      |                                                                |       |
| 28 |                            |                      |                                                                |       |
| 29 |                            |                      |                                                                |       |
| 30 |                            |                      |                                                                |       |
| 31 | Statistics: additional     | <a href="#">#20b</a> | Methods for any additional analyses (eg, subgroup and          | 17-18 |
| 32 | analyses                   |                      | adjusted analyses)                                             |       |
| 33 |                            |                      |                                                                |       |
| 34 |                            |                      |                                                                |       |
| 35 |                            |                      |                                                                |       |
| 36 | Statistics: analysis       | <a href="#">#20c</a> | Definition of analysis population relating to protocol non-    | 16-18 |
| 37 | population and             |                      | adherence (eg, as randomised analysis), and any                |       |
| 38 | missing data               |                      | statistical methods to handle missing data (eg, multiple       |       |
| 39 |                            |                      | imputation)                                                    |       |
| 40 |                            |                      |                                                                |       |
| 41 |                            |                      |                                                                |       |
| 42 |                            |                      |                                                                |       |
| 43 |                            |                      |                                                                |       |
| 44 |                            |                      |                                                                |       |
| 45 |                            |                      |                                                                |       |
| 46 | <b>Methods: Monitoring</b> |                      |                                                                |       |
| 47 |                            |                      |                                                                |       |
| 48 |                            |                      |                                                                |       |
| 49 | Data monitoring:           | <a href="#">#21a</a> | Composition of data monitoring committee (DMC);                | 18-19 |
| 50 | formal committee           |                      | summary of its role and reporting structure; statement of      |       |
| 51 |                            |                      | whether it is independent from the sponsor and                 |       |
| 52 |                            |                      | competing interests; and reference to where further            |       |
| 53 |                            |                      |                                                                |       |
| 54 |                            |                      |                                                                |       |
| 55 |                            |                      |                                                                |       |
| 56 |                            |                      |                                                                |       |
| 57 |                            |                      |                                                                |       |
| 58 |                            |                      |                                                                |       |
| 59 |                            |                      |                                                                |       |
| 60 |                            |                      |                                                                |       |

1 details about its charter can be found, if not in the  
 2 protocol. Alternatively, an explanation of why a DMC is  
 3 not needed  
 4  
 5  
 6  
 7

|    |                      |                      |                                                              |    |
|----|----------------------|----------------------|--------------------------------------------------------------|----|
| 8  | Data monitoring:     | <a href="#">#21b</a> | Description of any interim analyses and stopping             | NA |
| 9  | interim analysis     |                      | guidelines, including who will have access to these          |    |
| 10 |                      |                      | interim results and make the final decision to terminate     |    |
| 11 |                      |                      | the trial                                                    |    |
| 12 |                      |                      |                                                              |    |
| 13 |                      |                      |                                                              |    |
| 14 |                      |                      |                                                              |    |
| 15 |                      |                      |                                                              |    |
| 16 |                      |                      |                                                              |    |
| 17 |                      |                      |                                                              |    |
| 18 | Harms                | <a href="#">#22</a>  | Plans for collecting, assessing, reporting, and managing     | 15 |
| 19 |                      |                      | solicited and spontaneously reported adverse events and      |    |
| 20 |                      |                      | other unintended effects of trial interventions or trial     |    |
| 21 |                      |                      | conduct                                                      |    |
| 22 |                      |                      |                                                              |    |
| 23 |                      |                      |                                                              |    |
| 24 |                      |                      |                                                              |    |
| 25 |                      |                      |                                                              |    |
| 26 |                      |                      |                                                              |    |
| 27 |                      |                      |                                                              |    |
| 28 | Auditing             | <a href="#">#23</a>  | Frequency and procedures for auditing trial conduct, if      | 19 |
| 29 |                      |                      | any, and whether the process will be independent from        |    |
| 30 |                      |                      | investigators and the sponsor                                |    |
| 31 |                      |                      |                                                              |    |
| 32 |                      |                      |                                                              |    |
| 33 |                      |                      |                                                              |    |
| 34 |                      |                      |                                                              |    |
| 35 | <b>Ethics and</b>    |                      |                                                              |    |
| 36 | <b>dissemination</b> |                      |                                                              |    |
| 37 |                      |                      |                                                              |    |
| 38 |                      |                      |                                                              |    |
| 39 |                      |                      |                                                              |    |
| 40 |                      |                      |                                                              |    |
| 41 | Research ethics      | <a href="#">#24</a>  | Plans for seeking research ethics committee / institutional  | 2  |
| 42 | approval             |                      | review board (REC / IRB) approval                            |    |
| 43 |                      |                      |                                                              |    |
| 44 |                      |                      |                                                              |    |
| 45 |                      |                      |                                                              |    |
| 46 | Protocol             | <a href="#">#25</a>  | Plans for communicating important protocol modifications     | 20 |
| 47 | amendments           |                      | (eg, changes to eligibility criteria, outcomes, analyses) to |    |
| 48 |                      |                      | relevant parties (eg, investigators, REC / IRBs, trial       |    |
| 49 |                      |                      | participants, trial registries, journals, regulators)        |    |
| 50 |                      |                      |                                                              |    |
| 51 |                      |                      |                                                              |    |
| 52 |                      |                      |                                                              |    |
| 53 |                      |                      |                                                              |    |
| 54 |                      |                      |                                                              |    |
| 55 |                      |                      |                                                              |    |
| 56 |                      |                      |                                                              |    |
| 57 |                      |                      |                                                              |    |
| 58 |                      |                      |                                                              |    |
| 59 |                      |                      |                                                              |    |
| 60 |                      |                      |                                                              |    |

|    |                       |                      |                                                                |       |
|----|-----------------------|----------------------|----------------------------------------------------------------|-------|
| 1  | Consent or assent     | <a href="#">#26a</a> | Who will obtain informed consent or assent from potential      | 6, 20 |
| 2  |                       |                      | trial participants or authorised surrogates, and how (see      |       |
| 3  |                       |                      | Item 32)                                                       |       |
| 4  |                       |                      |                                                                |       |
| 5  |                       |                      |                                                                |       |
| 6  |                       |                      |                                                                |       |
| 7  |                       |                      |                                                                |       |
| 8  |                       |                      |                                                                |       |
| 9  | Consent or assent:    | <a href="#">#26b</a> | Additional consent provisions for collection and use of        | NA    |
| 10 | ancillary studies     |                      | participant data and biological specimens in ancillary         |       |
| 11 |                       |                      | studies, if applicable                                         |       |
| 12 |                       |                      |                                                                |       |
| 13 |                       |                      |                                                                |       |
| 14 |                       |                      |                                                                |       |
| 15 |                       |                      |                                                                |       |
| 16 | Confidentiality       | <a href="#">#27</a>  | How personal information about potential and enrolled          | 20    |
| 17 |                       |                      | participants will be collected, shared, and maintained in      |       |
| 18 |                       |                      | order to protect confidentiality before, during, and after     |       |
| 19 |                       |                      | the trial                                                      |       |
| 20 |                       |                      |                                                                |       |
| 21 |                       |                      |                                                                |       |
| 22 |                       |                      |                                                                |       |
| 23 |                       |                      |                                                                |       |
| 24 |                       |                      |                                                                |       |
| 25 |                       |                      |                                                                |       |
| 26 | Declaration of        | <a href="#">#28</a>  | Financial and other competing interests for principal          | 23    |
| 27 | interests             |                      | investigators for the overall trial and each study site        |       |
| 28 |                       |                      |                                                                |       |
| 29 |                       |                      |                                                                |       |
| 30 |                       |                      |                                                                |       |
| 31 |                       |                      |                                                                |       |
| 32 | Data access           | <a href="#">#29</a>  | Statement of who will have access to the final trial           | 20    |
| 33 |                       |                      | dataset, and disclosure of contractual agreements that         |       |
| 34 |                       |                      | limit such access for investigators                            |       |
| 35 |                       |                      |                                                                |       |
| 36 |                       |                      |                                                                |       |
| 37 |                       |                      |                                                                |       |
| 38 |                       |                      |                                                                |       |
| 39 | Ancillary and post    | <a href="#">#30</a>  | Provisions, if any, for ancillary and post-trial care, and for | NA    |
| 40 | trial care            |                      | compensation to those who suffer harm from trial               |       |
| 41 |                       |                      | participation                                                  |       |
| 42 |                       |                      |                                                                |       |
| 43 |                       |                      |                                                                |       |
| 44 |                       |                      |                                                                |       |
| 45 |                       |                      |                                                                |       |
| 46 |                       |                      |                                                                |       |
| 47 | Dissemination policy: | <a href="#">#31a</a> | Plans for investigators and sponsor to communicate trial       | 21    |
| 48 | trial results         |                      | results to participants, healthcare professionals, the         |       |
| 49 |                       |                      | public, and other relevant groups (eg, via publication,        |       |
| 50 |                       |                      | reporting in results databases, or other data sharing          |       |
| 51 |                       |                      | arrangements), including any publication restrictions          |       |
| 52 |                       |                      |                                                                |       |
| 53 |                       |                      |                                                                |       |
| 54 |                       |                      |                                                                |       |
| 55 |                       |                      |                                                                |       |
| 56 |                       |                      |                                                                |       |
| 57 |                       |                      |                                                                |       |
| 58 |                       |                      |                                                                |       |
| 59 |                       |                      |                                                                |       |
| 60 |                       |                      |                                                                |       |

1 Dissemination policy: [#31b](#) Authorship eligibility guidelines and any intended use of 21  
 2  
 3 authorship professional writers  
 4  
 5

6 Dissemination policy: [#31c](#) Plans, if any, for granting public access to the full 19  
 7  
 8 reproducible protocol, participant-level dataset, and statistical code  
 9  
 10 research  
 11  
 12  
 13

## 14 Appendices

15  
 16  
 17 Informed consent [#32](#) Model consent form and other related documentation NA  
 18  
 19 materials given to participants and authorised surrogates  
 20  
 21

22  
 23 Biological specimens [#33](#) Plans for collection, laboratory evaluation, and storage of NA  
 24  
 25 biological specimens for genetic or molecular analysis in  
 26  
 27 the current trial and for future use in ancillary studies, if  
 28  
 29 applicable  
 30  
 31

32  
 33 None The SPIRIT checklist is distributed under the terms of the Creative Commons Attribution  
 34  
 35 License CC-BY-ND 3.0. This checklist can be completed online using <https://www.goodreports.org/>, a  
 36  
 37 tool made by the [EQUATOR Network](#) in collaboration with [Penelope.ai](#)  
 38  
 39  
 40  
 41  
 42  
 43  
 44  
 45  
 46  
 47  
 48  
 49  
 50  
 51  
 52  
 53  
 54  
 55  
 56  
 57  
 58  
 59  
 60

# BMJ Open

## Internet-based cognitive behavioral therapy for prevention of depression during pregnancy and in the postpartum (iPDP): a protocol for a large scale randomized controlled trial

|                                 |                                                                                                                                                                                                                                                                                                                                                                                                                                                                                                                                                                                                                                                                                                           |
|---------------------------------|-----------------------------------------------------------------------------------------------------------------------------------------------------------------------------------------------------------------------------------------------------------------------------------------------------------------------------------------------------------------------------------------------------------------------------------------------------------------------------------------------------------------------------------------------------------------------------------------------------------------------------------------------------------------------------------------------------------|
| Journal:                        | <i>BMJ Open</i>                                                                                                                                                                                                                                                                                                                                                                                                                                                                                                                                                                                                                                                                                           |
| Manuscript ID                   | bmjopen-2019-036482.R1                                                                                                                                                                                                                                                                                                                                                                                                                                                                                                                                                                                                                                                                                    |
| Article Type:                   | Protocol                                                                                                                                                                                                                                                                                                                                                                                                                                                                                                                                                                                                                                                                                                  |
| Date Submitted by the Author:   | 16-Mar-2020                                                                                                                                                                                                                                                                                                                                                                                                                                                                                                                                                                                                                                                                                               |
| Complete List of Authors:       | Nishi, Daisuke; The University of Tokyo, Department of Mental Health<br>Imamura, Kotaro; The University of Tokyo, Department of Mental Health<br>Watanabe, Kazuhiro; The University of Tokyo, Department of Mental Health, Graduate School of Medicine<br>Obikane, Erika; The University of Tokyo, Department of Mental Health<br>Sasaki, Natsu; The University of Tokyo, Department of Mental Health<br>Yasuma, Naonori; The University of Tokyo, Department of Mental Health<br>Sekiya, Yuki; The University of Tokyo, Department of Mental Health<br>Matsuyama, Yutaka; The University of Tokyo, Department of Biostatistics<br>Kawakami, Norito; The University of Tokyo, Department of Mental Health |
| <b>Primary Subject Heading</b>: | Mental health                                                                                                                                                                                                                                                                                                                                                                                                                                                                                                                                                                                                                                                                                             |
| Secondary Subject Heading:      | Public health                                                                                                                                                                                                                                                                                                                                                                                                                                                                                                                                                                                                                                                                                             |
| Keywords:                       | MENTAL HEALTH, Depression & mood disorders < PSYCHIATRY, PREVENTIVE MEDICINE                                                                                                                                                                                                                                                                                                                                                                                                                                                                                                                                                                                                                              |
|                                 |                                                                                                                                                                                                                                                                                                                                                                                                                                                                                                                                                                                                                                                                                                           |

SCHOLARONE™  
Manuscripts



I, the Submitting Author has the right to grant and does grant on behalf of all authors of the Work (as defined in the below author licence), an exclusive licence and/or a non-exclusive licence for contributions from authors who are: i) UK Crown employees; ii) where BMJ has agreed a CC-BY licence shall apply, and/or iii) in accordance with the terms applicable for US Federal Government officers or employees acting as part of their official duties; on a worldwide, perpetual, irrevocable, royalty-free basis to BMJ Publishing Group Ltd ("BMJ") its licensees and where the relevant Journal is co-owned by BMJ to the co-owners of the Journal, to publish the Work in this journal and any other BMJ products and to exploit all rights, as set out in our [licence](#).

The Submitting Author accepts and understands that any supply made under these terms is made by BMJ to the Submitting Author unless you are acting as an employee on behalf of your employer or a postgraduate student of an affiliated institution which is paying any applicable article publishing charge ("APC") for Open Access articles. Where the Submitting Author wishes to make the Work available on an Open Access basis (and intends to pay the relevant APC), the terms of reuse of such Open Access shall be governed by a Creative Commons licence – details of these licences and which [Creative Commons](#) licence will apply to this Work are set out in our licence referred to above.

Other than as permitted in any relevant BMJ Author's Self Archiving Policies, I confirm this Work has not been accepted for publication elsewhere, is not being considered for publication elsewhere and does not duplicate material already published. I confirm all authors consent to publication of this Work and authorise the granting of this licence.

1  
2  
3  
4 Title: Internet-based cognitive behavioral therapy for prevention of depression during pregnancy and  
5  
6 in the postpartum (iPDP): a protocol for a large scale randomized controlled trial  
7  
8  
9  
10  
11

12 Authors: Daisuke Nishi, MD, PhD<sup>1</sup>, Kotaro Imamura, PhD<sup>1</sup>, Kazuhiro Watanabe, PhD<sup>1</sup>, Erika  
13  
14 Obikane, MD<sup>1</sup>, Natsu Sasaki, MD<sup>1</sup>, Naonori Yasuma, MD<sup>1</sup>, Yuki Sekiya, PhD<sup>1</sup>, Yutaka  
15  
16 Matsuyama<sup>2</sup>, PhD, Norito Kawakami, MD, PhD<sup>1</sup>  
17  
18  
19  
20  
21

22 <sup>1</sup>Department of Mental Health, Graduate School of Medicine, The University of Tokyo, 7-3-1  
23  
24 Hongo, Bunkyo-ku, Tokyo 113-0033, Japan  
25

26 <sup>2</sup>Department of Biostatistics, Graduate School of Medicine, The University of Tokyo, 7-3-1 Hongo,  
27  
28 Bunkyo-ku, Tokyo 113-0033, Japan  
29  
30  
31  
32  
33  
34

35 Corresponding author: Daisuke Nishi  
36

37 Department of Mental Health, Graduate School of Medicine, The University of Tokyo, 7-3-1 Hongo,  
38  
39 Bunkyo-ku, Tokyo 113-0033, Japan  
40  
41

42 E-mail: [d-nishi@m.u-tokyo.ac.jp](mailto:d-nishi@m.u-tokyo.ac.jp)  
43  
44  
45  
46  
47  
48  
49  
50  
51  
52  
53  
54  
55  
56  
57  
58  
59  
60

## Abstract

**Introduction:** The objective of this randomized controlled trial (RCT) is to examine the effects of smartphone-based cognitive behavioral therapy (CBT) in preventing the onset of major depressive episodes (MDE) among pregnant women.

**Methods and analysis:** The target study population will be pregnant women of 16 to 20 weeks gestation who are currently users of “Luna Luna Baby,” the most widely used app for pregnant women in Japan. Those who meet the eligibility criteria will be randomly allocated to the 6-module internet cognitive behavioral therapy (iCBT) program that was newly developed for pregnant women (n=2500), or to a treatment-as-usual control group (n=2500). Participants in the intervention groups will be required to complete the program by 32 weeks gestation. The primary outcomes are the number of new onsets of MDE, measured by using the World Health Organization Composite International Diagnostic Interview 3.0 (WHO-CIDI 3.0) at 32 weeks gestation and 3 months postpartum. Survival analysis will be conducted to test for the effectiveness of the intervention on the time to the onset of MDE.

**Ethics and dissemination:** The study plan has been approved by the Research Ethics Review Board of the Graduate School of Medicine/Faculty of Medicine, the University of Tokyo (2019150NI). If the intervention programs are found to produce a significant positive effect in this RCT, these programs can be made available for all users of the app in the future.

**Keywords:** smartphone-based cognitive behavioral therapy, antenatal depression, postpartum depression, prevention

**Trial registration number:** UMIN000038190; Pre-results.

**Issue date:** 16<sup>th</sup>, Dec, 2019



## Article Summary

### Strengths and limitations of this study

- The large sample size of this RCT can lead to a definitive result of the effectiveness of the fully automated smartphone-based CBT program in preventing both antenatal and postpartum depression.
- The newly developed program was tailored for pregnant women by extracting essential topics for them based on data from consultations on pregnant women's concerns.
- This study will also evaluate the implementation outcomes of iCBT program, which will contribute to the dissemination and implementation of iCBT.
- This RCT will also clarify whether iCBT during pregnancy can prevent maternity blues.
- A limitation of this study is that all of the outcomes will be measured by self-report.

## Introduction

Prevention of perinatal depression is a critical public health issue.[1] The prevalence of antenatal depression was reported to be 7.4% in the first trimester, 12.8% in the second trimester, and 12.0% in the third trimester;[2] and the prevalence of postpartum depression was estimated to be 17.7%, though there is significant heterogeneity across nations.[3] Antenatal depression is associated with failing to seek prenatal care, an inadequate diet and/or use of tobacco, alcohol, or other harmful substances, self-harm or attempted suicide, and postpartum depression; while postpartum depression is associated with negative outcomes such as physical and psychological abuse to their children, and infanticide.[4] Furthermore, perinatal depression can also affect development from fetus to adolescent and paternal depression.[5-10] Therefore, preventing perinatal depression in the antenatal period is crucially important.

Given the large number of pregnant women who have risk factors such as maternal anxiety, life stress, lack of social support, unintended pregnancy, domestic violence, lower income and education, and poor relationships, making it difficult to identify and screen all high-risk pregnant women,[11] universal prevention should be more valued. According to a systematic review and meta-analysis, psychological interventions have been recommended as the most effective approach to prevent antenatal and postpartum depression.[12] Cognitive behavioral therapy (CBT) has been broadly researched and reported to be highly effective among psychological interventions.[13,14] Previous meta-analyses showed that the effect size of psychological intervention as universal prevention, which refers to approaches designed for the whole population regardless of individual risk factors, for postpartum depression was reported to be 0.19[15] and 0.37.[13] The timing of interventions of RCTs included in these meta-analyses were both during pregnancy and postpartum.

With respect to universal prevention, fully automated internet-based CBT (iCBT) is preferable to face-to-face or guided iCBT in terms of accessibility, anonymity, and cost-effectiveness.[16] Although a systematic review showed a positive effect of iCBT for the improvement of perinatal

1  
2  
3  
4 depressive symptoms,[17] to our knowledge, there have been only two randomized controlled trials  
5  
6 (RCTs) for universal prevention using automated iCBT during pregnancy.[18,19] These two studies  
7  
8 did not assess the major depressive episode (MDE); instead, they used depressive symptoms as  
9  
10 outcomes. In addition, a dropout from iCBT in these studies was relatively high (66% and 44%,  
11  
12 respectively). A large number of sessions and/or the length per session may be impractical for a  
13  
14 substantial number of pregnant women to complete, which may cause a high dropout rate. Thus, it  
15  
16 would be necessary to develop a program that is more acceptable and feasible for pregnant women.  
17  
18 In this regard, 6-sessions of 5 to 10-minutes iCBT programs were shown to be effective for  
19  
20 preventing depressive symptoms for workers.[20]  
21  
22

23  
24 Moreover, to our knowledge, no previous randomized controlled trials (RCTs) have examined  
25  
26 the effect of iCBT on maternity blues. Maternity blues were characterized by psychological distress  
27  
28 with a peak at 3 to 5 days after childbirth, though diagnostic criteria have not been well established.  
29  
30 Maternity blues are highly prevalent and have been shown to be a risk factor for postpartum  
31  
32 depression [21]; thus, it will be relevant to develop the intervention to prevent not only perinatal  
33  
34 depression but also maternity blues.  
35  
36

37  
38 The primary objective of this RCT is to examine the effectiveness of the newly developed 6-  
39  
40 sessions of 5 to 10-minutes, smartphone-based, automated iCBT programs in preventing the onset of  
41  
42 MDE at the third trimester and 3-months postpartum among pregnant women currently in the second  
43  
44 trimester. The secondary objectives are to examine the effectiveness of iCBT for preventing  
45  
46 maternity blues. The program would be practical and could be utilized by many pregnant women. In  
47  
48 addition, intervention during early pregnancy will enable the prevention of not only postpartum  
49  
50 depression but also antenatal depression.  
51  
52  
53  
54

## 55 **Methods and Analysis**

### 56 **Trial design**

1  
2  
3  
4 The study will be a two-arm, parallel-group, treatment-as-usual (TAU) controlled,  
5  
6 randomized trial. The allocation ratio of the intervention groups to the control group is 1:1. Random  
7  
8 assignments are stratified by Kessler's Psychological Distress Scale (K6) scores (groups of 4 points or  
9  
10 less and groups of 5 points or more) in the baseline survey. K6 is a self-report questionnaire, which  
11  
12 assesses psychological distress during the past 30 days. Users of the app ("Luna Luna Baby" run by  
13  
14 MTI Ltd.) will be recruited. The app provides the users for the growth of the fetus and the mental and  
15  
16 physical condition of the pregnant women according to the number of gestation weeks. Users register  
17  
18 the date of the last menstruation in the app; thus, we can find out the number of weeks of pregnancy.  
19  
20  
21

22 Follow-up assessments will be conducted at 32 weeks gestation and 3-months postpartum.  
23  
24 This protocol is written in accordance with the Standard Protocol Items: Recommendations for  
25  
26 Interventional Trials guideline checklist.[22] The trial start date was the 27<sup>th</sup> of November, 2019, and  
27  
28 the last follow-up date will be the 31<sup>st</sup> of March, 2021.  
29  
30  
31

### 32 33 **Participants**

34  
35 Pregnant women who have user IDs for the latest version of the app and meet the following  
36  
37 criteria will be invited to participate in this RCT. Both primipara and multiparous women will be  
38  
39 included.  
40  
41

### 42 **Eligibility criteria**

- 43  
44 1. Being over 20 years old
- 45  
46 2. Being 16 to 20 weeks gestation
- 47  
48 3. Not diagnosed with a MDE in the past month by the web-based self-administered version of the  
49  
50 WHO Composite International Diagnostic Interview 3.0 (WHO-CIDI 3.0)[23]
- 51  
52 4. Not diagnosed with lifetime bipolar disorder (WHO-CIDI 3.0)
- 53  
54  
55  
56  
57

### 58 **Recruitment**

1  
2  
3  
4 **Figure 1** shows the study flow of this trial. MTI Ltd. sends an invitation message to potentially  
5  
6 eligible pregnant women, which will include an explanation of the study and information on the  
7  
8 eligibility criteria. After reading the explanation of the study, potential participants will be invited to  
9  
10 give their consent on the app to participate in the study and to complete and return the baseline survey.  
11  
12 MTI Ltd. will also send messages to study participants to join in follow-up assessments.

13  
14  
15 Five thousand pregnant women will be randomized to either the intervention group (n=2500),  
16  
17 or the control group (n=2500). Participants in the intervention groups will be required to complete the  
18  
19 intervention program up to 32 weeks gestation. Participants will be asked not to share this information  
20  
21 through any social network. The participants will be reminded by a popup message to complete the  
22  
23 program if they have not already done so. Intervention programs will be closed at 32 weeks gestation.

24  
25  
26 Participants in the control group will not receive any intervention programs during the  
27  
28 intervention and follow-up period. General information about mental health during pregnancy will be  
29  
30 provided to participants in both the intervention group and the control group as a TAU.  
31  
32  
33  
34

### 35 **Interventions**

36  
37 A smartphone-based six-module CBT program designed for pregnant women was newly  
38  
39 developed. Specifically, the first author (DN) developed the iCBT program with the collaboration of  
40  
41 co-authors (KI, EO, NS, and YS). The program was tailored for pregnant women by extracting  
42  
43 essential topics that pregnant women are concerned about. The details were shown in patient and public  
44  
45 involvement section. This program will be provided via the Luna Luna Baby app, so users of the app  
46  
47 don't have to download another app. Some components of the modules were derived from a previous  
48  
49 iCBT program that successfully prevented the onset of MDE among office workers.[20] Other  
50  
51 components such as behavioral activation based on values, self-compassion, and mindfulness have  
52  
53 been incorporated, which could be regarded as the third wave CBT. The six modules are presented in  
54  
55 a fixed order, with one module accessible per week, from module 1 to module 6 (Table 1). It will take  
56  
57  
58  
59  
60

1  
2  
3  
4 about 5 min to complete each module. The program includes psychoeducation (module 1), case  
5  
6 formulation based on a cognitive behavioral model (module 2), behavioral activation (module 3), self-  
7  
8 compassion (module 4), mindfulness (module 5), and problem-solving (module 6). Details of each of  
9  
10 the components are as follows.

### 11 12 **Psychoeducation (module 1)**

13  
14  
15 In this module, participants learn about the roles of what are generally called “negative”  
16  
17 emotions such as anxiety, depressive mood and anger. Each emotion is necessary for us; for example,  
18  
19 anxiety is a sign that warns us of some risk in the future and promotes us to prepare for the future. This  
20  
21 module was designed to help participants face and deal with their own emotions in subsequent modules.  
22  
23 As an example of anxious situations, a scene that a partner of a pregnant woman is busy working and  
24  
25 is not at home is used. As an example of sad situations, a scene when a pregnant woman suffers from  
26  
27 morning sickness but the boss does not understand is used.  
28  
29

### 30 31 **Case formulation based on cognitive-behavioral model (module 2)**

32  
33 In this module, participants learn about a cognitive-behavioral (CB) model, especially the  
34  
35 five-part model (situation, thoughts, emotions, behavior, and physical sensations) and a case  
36  
37 formulation based on this model.[24] Case formulation is a method used to understand the problems  
38  
39 of patients or clients. Case formulation is helpful for participants to choose an appropriate approach to  
40  
41 change the vicious circles of these five areas. A scene when a pregnant woman suffers from morning  
42  
43 sickness but the boss does not understand is used as a case.  
44  
45

### 46 47 **Behavioral activation (module 3)**

48  
49 Behavioral activation is a process to increase pleasurable and rewarding activities using  
50  
51 behavioral strategies such as activity scheduling. This module provides a behavioral activation  
52  
53 technique for enhancing participants’ liveliness. In this module, participants learn about the theory of  
54  
55 behavioral activation and how to plan an activity schedule to increase pleasant activities. Participants  
56  
57 are also encouraged to identify their values based on brief behavioral activation therapy for depression  
58  
59  
60

1  
2  
3  
4 (BATD),[25] and acceptance and commitment therapy (ACT).[26] A scene when a pregnant woman  
5  
6 would not like to go out because she has gained weight and is not motivated is used as a case.  
7

#### 8 **Self-compassion (module 4)**

9  
10 Self-compassion indicates a positive and caring attitude of a person towards herself in the face  
11  
12 of stressful events.[27] As a result of this attitude, highly self-compassionate individuals are expected  
13  
14 to experience higher individual well-being.[28] Three interrelated determine the self-compassionate  
15  
16 reactions to negative events and experiences: self-kindness, sense of common humanity and  
17  
18 mindfulness. In this module, participants learn the concept of self-compassion and how to express  
19  
20 compassion towards themselves. A scene when a pregnant woman suffers from morning sickness and  
21  
22 is blaming herself for not being able to work as usual is used as a case.  
23  
24  
25

#### 26 **Mindfulness (module 5)**

27  
28 Mindfulness is defined as “paying attention in a particular way: on purpose, in the present  
29  
30 moment, and nonjudgmentally”.[29] Mindful persons are likely to be aware of the physical sensation,  
31  
32 thoughts, and emotions at that moment, which enables them to stop their usual reactions to a stressful  
33  
34 event so that symptoms and problematic behaviors are likely to disappear. In this module, participants  
35  
36 learn about the concept of mindfulness and how to practice it through listening to voice guidance. A  
37  
38 scene when a pregnant woman feels anxiety due to tension and pain in the lower abdomen in spite of  
39  
40 obstetrically normal is used as a case.  
41  
42  
43

#### 44 **Problem-solving (module 6)**

45  
46 Problem-solving technique is a CB intervention that focuses on training adaptive problem-  
47  
48 solving attitudes and skills.[30] A rational problem-solving style contains the systematic application  
49  
50 of four problem-solving skills: (1) problem definition and formulation, (2) generation of alternative  
51  
52 solutions, (3) decision making and (4) solution implementation and verification. In this module,  
53  
54 participants learn about problem-solving skills to sort out the problem and make a list of solutions, and  
55  
56 assertiveness to communicate with their partners confidently. A scene when a pregnant woman wants  
57  
58  
59

her partner to do more in housework and childcare is used as a case.

## Outcomes

**Table 2** shows an overview of the outcome measures. Those who have not responded by more than a week after the online questionnaire is distributed will receive a popup message to complete each assessment.

### Primary outcome

The primary outcome is the onset of MDE during the 32 weeks gestation and 3 months postpartum. The onset of MDE during the follow-up will be assessed using the web-based self-administered version of the Japanese WHO-CIDI 3.0 depression section, according to DSM-IV-TR criteria. The web version has been shown to have a good concordance with the clinical diagnosis of MDE and to be reliable in a 1-year test-retest survey. An incident case with MDE will be identified if a respondent reports an episode of MDE at either 32 weeks gestation or 3 months postpartum. An onset month for an episode of MDE also will be requested. In addition, two other definitions are applied to identify sub-threshold depressive episodes: one requires a shorter duration of symptoms (i.e. 7 days or more, rather than 2 weeks or more); the other one requires having a fewer symptoms (i.e. having 3 symptoms or more, instead of 5 symptoms or more).

### Secondary outcomes

#### The Edinburgh Postnatal Depression Scale (EPDS)

Depressive symptoms will be measured by the Japanese version of EPDS [31, 32]. EPDS is used most often for screening perinatal depression because it focuses on cognitive symptoms of depression and excludes somatic items that can generate false positives during pregnancy and postpartum. It consists of 10 items, with 0-3 points scored per item for a potential scale score of 0-30. The higher scores indicate more severe depressive symptoms. EPDS will be conducted at baseline, 32 weeks gestation, 1 week postpartum and 3 months postpartum.



### **Kessler's Psychological Distress Scale (K6)**

Psychological distress is measured by the Japanese version of K6.[33,34] K6 consists of six items assessing the frequency with which respondents have experienced symptoms of psychological distress during the past 30 days. The response options range from 0 (none of the time) to 4 (all of the time), and the total score ranges from 0 to 24. The higher scores indicate more severe psychological distress. K6 will be conducted at baseline, 32 weeks gestation, 1 week postpartum and 3 months postpartum.

### **EuroQol -5 dimension-5 level (ED-5D-5L)**

General health status will be measured by the Japanese version of EQ-5D-5L.[35-37] It is a 5-dimensional utility instrument consisting of domains about morbidity, self-care, usual activities, pain or discomfort, and anxiety or depression. Each domain is divided into 5 levels of severity (none, slight, moderate, severe, extreme problems, or unable to). All responses are converted into a single index score of general health status. ED-5D-5L will be conducted at baseline, 32 weeks gestation and 3 months postpartum.

### **Somatic symptom Scale-8 (SSS-8)**

Somatic symptoms will be measured by Japanese version of SSS-8.[38,39] SSS-8 consists of 8 items that assess the following symptoms: stomach or bowel problems; back pain; pain in the arms, legs, or joints; headaches; chest pain or shortness of breath; dizziness; feeling tired or having low energy; and trouble sleeping. These items comprise the four symptom domains of gastrointestinal, pain, cardiopulmonary, and fatigue. Respondents rate how much each symptom has bothered them during the previous 7 days and score each item from 0 to 4: not at all (0), a little bit (1), somewhat (2), quite a bit (3), and very much (4). The total score ranges from 0 to 32. A higher score reflects a more severe somatic symptom burden. SSS-8 will be conducted at baseline, 32 weeks gestation and 3 months postpartum.

### **Tachikawa Resilience Scale (TRS)**

1  
2  
3  
4 Resilience will be measured by TRS.[40] TRS consists of 10 items. All items are scored on  
5  
6 a 7-point scale from 1 (strongly disagree) to 7 (strongly agree), with a total score ranging from 10 to  
7  
8 70. Higher scores reflect higher resilience. TRS will be conducted at baseline, 32 weeks gestation  
9  
10 and 3 months postpartum.

### 11 12 **The Insomnia Severity Index (ISI)**

13  
14  
15 Insomnia will be measured by the Japanese version of ISI.[41,42] ISI consists of 7 items  
16  
17 assessing the severity of sleep-onset and sleep maintenance difficulties (both nocturnal and early  
18  
19 morning awakenings), satisfaction with the current sleep pattern, interference with daily functioning,  
20  
21 awareness of impairment attributed to the sleep problem, and degree of distress or concern caused by  
22  
23 the sleep problem. Each item is rated on a 0 to 4 scale and the total score ranges from 0 to 28. A  
24  
25 higher score suggests more severe insomnia. ISI will be conducted at baseline, 32 weeks gestation  
26  
27 and 3 months postpartum.

### 28 29 30 **Cambridge-Hopkins questionnaire short form (CH-RLSq13)**

31  
32  
33 Restless legs syndrome (RLS) will be measured by the Japanese version of CH-  
34  
35 RLSq13.[43,44] CH-RLSq13 consists of 13 items. Diagnosis of RLS is performed using 10 items  
36  
37 consisting of questions about discomfort and stiffness of the lower limbs. In addition, 2 items ask  
38  
39 about the degree of pain and the frequency of occurrence and 1 item asks about the age of onset  
40  
41 (relevant to pregnancy in women). CH-RLSq13 will be conducted at baseline, 32 weeks gestation  
42  
43 and 3 months postpartum.

### 44 45 46 **Maternal Anxiety Scale for 4-5-month-old children**

47  
48  
49 Maternal anxiety will be measured by the Maternal Anxiety Scale for 4-5-month-old  
50  
51 children.[45] This scale consists of 34 items. Eleven items assess childcare anxiety, 6 items assess  
52  
53 husbands' or partners' support, 5 items assess childcare satisfaction, 4 items assess ease of raising  
54  
55 children, 5 items assess a lack of confidence, and 3 items assess presence or absence of advisors. All  
56  
57 items are scored on a 4-point scale from 1 (strongly disagree) to 4 (strongly agree). A higher score of  
58  
59

1  
2  
3  
4 each subscale reflects a higher presence of each factor. This scale will be conducted at 3 months  
5  
6 postpartum.  
7

### 8 **Medical economic costs**

9  
10 For cost-effectiveness analysis, the presence or absence, frequency and duration of medical  
11 service use, and the use of drugs over the prior three months will be asked at 32 weeks gestation and  
12  
13 3 months postpartum.  
14  
15  
16

### 17 **Process evaluation**

#### 18 **Implementation outcomes**

19  
20 Time spent logged in to each module will be measured. Also, we will evaluate implementation  
21 outcomes by self-report via survey. Proctor and colleagues suggested 8 conceptually distinct  
22 implementation outcomes: acceptability, adoption, appropriateness, feasibility, fidelity,  
23 implementation cost, penetration, and sustainability.[46] However, a systematic review examined  
24 implementation outcomes for mental health and behavioral health using evidence-based rating criteria  
25 and concluded that the majority of instrumental outcomes were underdeveloped.[47] Recently, Weiner  
26 et al. developed measures of acceptability, appropriateness, and feasibility because their outcomes are  
27 often used as leading indicators and are conceptually distinct.[48] Three of the authors (DN, EO, NS)  
28 reviewed the previous literature and selected the possible outcomes for each dimension of acceptability,  
29 appropriateness, and feasibility. These implementation outcomes and satisfaction with the intervention  
30 program will be asked about at 34 weeks gestation.  
31  
32  
33  
34  
35  
36  
37  
38  
39  
40  
41  
42  
43  
44  
45

### 46 **Adverse effects**

47  
48 Three of the authors (DN, EO, NS) reviewed the previous literature based on a systematic  
49 review, and selected the possible adverse effects of the program, such as physical symptoms (e.g., tired  
50 eyes, stiff shoulders), mental symptom (e.g., insomnia), dangerous experiences (e.g., collide with  
51 people while walking and looking at the smartphone), too much use of the smartphone, and excessive  
52 pressure to learn this program regularly. These potential adverse effects will be asked about at 34  
53  
54  
55  
56  
57  
58  
59  
60

1  
2  
3  
4 weeks gestation.

## 5 6 **Data collection**

7  
8 All data will be collected by the internet. If the entered data is incomplete, participants will  
9  
10 not be able to proceed the assessment.  
11  
12

## 13 14 15 **Sample size calculation**

16  
17 Required sample size was calculated for the primary outcome. New onset of MDE during the  
18  
19 observation period in Japan and the effect size in hazard ratio are estimated to be 5% and 0.65,[49]  
20  
21 based on previous studies. Thirty percent of participants are expected to drop out of the follow-up  
22  
23 assessment. Given an  $\alpha$  level of 0.05 (two-tailed) and a  $\beta$  level of 0.20, power Cox was performed with  
24  
25 STATA 14.0 and the appropriate sample size was calculated to be 4812. Since a large number of  
26  
27 participants using the app will be recruited on one day, it is considered difficult to stop recruiting  
28  
29 immediately when the sample size is reached. Thus, the sample size was set at 5,000.  
30  
31  
32  
33  
34

## 35 36 **Randomization**

37  
38 Participants who meet the inclusion criteria will be randomly allocated to the intervention  
39  
40 group or control group. Participants will be stratified into two strata according to the score of K6 (4 or  
41  
42 less, or 5 or more) on the baseline survey. MTI Ltd. will send baseline data to researchers. In addition  
43  
44 to the analysis of the whole sample (to examine the universal intervention effect), we will also analyze  
45  
46 data by prespecified subgroups (to examine the selective intervention effect). Using a computer-  
47  
48 generated random allocation sequence, an independent biostatistician created a stratified permuted-  
49  
50 block random table. The block size of this RCT will be fixed at 4. The stratified permuted-block  
51  
52 random table will be password protected and blinded to the researcher. Only the research assistant will  
53  
54 be able to access it during the work of random allocation. MTI Ltd. will make the study participants  
55  
56 allocated to the intervention group available to view the iCBT program on the app, based on the  
57  
58  
59  
60

1  
2  
3  
4 allocation provided by the research assistant.  
5  
6  
7

## 8 **Statistical methods**

9

### 10 **Main analysis**

11  
12 A survival analysis will be conducted to test for the effectiveness of the intervention on the  
13 time to the onset of MDE while controlling for censoring effects due to the differential length of  
14 follow-up or the completion of follow-up without an onset of MDE. Length of follow-up for each  
15 participant will be represented by either the number of months between the baseline and the onset of  
16 MDE or the end of the follow-up period (3-month postpartum, or 32 weeks gestation if a participant  
17 dropped out at the 3-month postpartum follow-up), whichever comes first. The cumulative incidence  
18 of MDE at the 32 weeks gestation and 3-month postpartum follow-up, as well as event-free survivals  
19 at every follow-up month, will be estimated using the Kaplan–Meier method; the statistical  
20 significance will be tested of the difference between the cumulative proportions of having MDE at 32  
21 weeks gestation and 3-month postpartum follow-ups in the intervention and control groups. A log-  
22 rank test will be conducted to test the difference in survival probabilities between the intervention and  
23 the control groups. A single covariate Cox discrete time hazard model will also be used to test the  
24 difference and estimate the hazard ratio (HR), with 95% confidence intervals (CIs), for having MDE  
25 in the intervention group compared to the control group. The intervention effect will also be estimated,  
26 adjusting for dependent censoring and using the inverse probability of the censoring weighted (IPCW)  
27 method for conducting a sensitivity analysis.[50] The number needed to treat (NNT) to achieve  
28 prevention of one case of the onset of MDE will be calculated at 32 weeks gestation and 3-month  
29 postpartum follow-ups. A similar Cox discrete time hazard model also will be conducted using the two  
30 types of sub-threshold diagnoses of depressive episodes to investigate the effects of iCBT on  
31 preventing depressive episodes, including subclinical cases. An intention-to-treat (ITT) analysis will  
32 be conducted. Multiple imputation will be performed.  
33  
34  
35  
36  
37  
38  
39  
40  
41  
42  
43  
44  
45  
46  
47  
48  
49  
50  
51  
52  
53  
54  
55  
56  
57  
58  
59  
60

## Secondary analyses

For secondary outcomes (i.e. EPDS, K6, SSS-8, TRS), mixed models for repeated measures analyses will be conducted using a group (intervention or control)  $\times$  time (baseline, 32 weeks gestation, 1 week postpartum or 3-month postpartum follow-up) interaction as an indicator of the intervention effect. This allow for missing data to be taken into account within the statistical model. The level of statistical significance for all analyses in this study will be set at 0.05 (two-tailed), and 95% CIs will be calculated. The effect size will be estimated in two ways. First, we will estimate a regression coefficient for a group (the intervention group vs. the control group)  $\times$  time (baseline and follow-ups) interaction using the MIXED procedure, which will be converted to an effect size by dividing by a pooled SD at baseline and at follow-ups. Second, we will calculate Cohen's d among completers at baseline for each follow-up. ITT will be conducted as well. All statistical analyses will be conducted using SPSS Statistics 21.0 (IBM Corp., USA).

## Subgroup analysis

The effectiveness of the programs may differ according to the initial severity of psychological distress. Therefore, we will analyze the results according to the prespecified subgroups (i.e., participants who scored 4 or less/5 or more in K6 at the baseline survey).

## Cost-effectiveness analysis

Quality-adjusted life-years (QALYs) will be calculated as the effectiveness, using the EQ-5D-5L, as the area under the curve defined by the unitality values at baseline and follow-ups.[51] As for the costs, the cost of medical service use will be calculated based on the Survey of Medical Care Activities in Public Health Insurance,[52] which shows the treatment expenses covered by public health insurance in each diagnostic category. No intervention costs such as salary for therapists will be calculated because the program is fully-automated. Mean differences for the calculated effectiveness and costs will be compared between the intervention and control group.

### **Data monitoring and auditing**

Because the iCBT program is not regarded as an invasive intervention, it is not necessary to set up a data monitoring board or to complete auditing in this trial.

### **Data availability**

Deidentified individual participant data will be available upon reasonable request after publication of the main analysis paper. Contact information is the email address of the corresponding author.

### **Patient and public involvement**

We utilized the function of the app “Luna Luna Baby” that allows users (pregnant women) to talk to each other about their problems. We extracted essential topics that pregnant women are concerned about based on 6393 text data, and developed programs for those topics. Even MTI, Ltd. cannot identify the person who posted a text, thus the text data is anonymized data that cannot be linked. The procedure was approved by the ethic committee of the University of Tokyo. The topics were extracted by using a machine learning approach, based on the Latent Dirichlet Allocation (LDA).[53] In this approach, morphological analysis was conducted for the text data from the pregnant women, and nouns and adjectives about what they suffer were collected. The LDA model was implemented by Scikit-learn version 0.21.3 [54] in Python. As a result, five topics were extracted: relationship with partners, concern about weight gain, concern about pregnancy checkup, physical symptoms such as pain, and dysfunction due to morning sickness. Since pregnancy checkup is considered to be a matter of obstetrics, each module of the iCBT program has been developed to deal with the remaining 4 topics. We will not access this chatroom during the RCT.

In addition, three women who had experiences of pregnancy and childbirth (two researchers and a research partner with lived experience) were invited to make comments on the intervention programs based on their experiences and preferences. All of them experienced maternity blues or

1  
2  
3  
4 perinatal depression, though they did not visit psychiatrists. Two researchers above (EO, NS) also  
5  
6 were involved in designing this protocol.  
7  
8  
9

## 10 **Ethics and dissemination**

### 11 **Ethical and safety considerations**

12  
13  
14  
15 Informed consent for the app will be obtained from all participants included in this study  
16  
17 after full explanation of the study. Candidates will be informed that their participation is voluntary,  
18  
19 and that even after voluntarily participating, they can withdraw from the study at any time and their  
20  
21 withdrawal will cause no disadvantage to them. We expect no adverse health effects from this  
22  
23 intervention, except possible deterioration in depressive symptoms. We will send messages to those  
24  
25 who meet the criteria for MDE in the past month or for lifetime bipolar disorders at baseline to  
26  
27 encourage them to see a psychiatrist. The principal investigators will communicate important  
28  
29 protocol modification with the institutional review board.  
30  
31  
32

### 33 **Data confidentiality**

34  
35 The collected data will be stored as linkable anonymizing data. The principal investigator  
36  
37 will have access to the final dataset after the trial and take responsibility for the integrity of the data  
38  
39 and the accuracy of analysis.  
40  
41

### 42 **Dissemination of research findings**

43  
44 The findings of this study will be disseminated through publications in peer-reviewed  
45  
46 international journals. Presentations of the findings will also be offered at relevant research  
47  
48 conferences, and local academic symposia and seminars. If important findings are obtained from this  
49  
50 study, we will make a press release and provide a plain language summary for users of Luna Luna  
51  
52 baby. The principal investigator will be listed as corresponding authors, and the authorship eligibility  
53  
54 will be conformed to the International Committee of Medical Journal Editors. If the intervention  
55  
56 programs are found to be significantly positively effective, the programs can be made available for  
57  
58  
59  
60



1  
2  
3  
4 all users of the app in the future.  
5  
6  
7

## 8 **Discussion** 9

10 The greatest strength of this study is to prove the effectiveness of the fully automated  
11 smartphone-based CBT program on preventing both antenatal and postpartum depression. The  
12 relatively short, newly developed programs for pregnant women would be practical and low dropout  
13 is expected. Furthermore, this study will assess diagnosis of MDE using CIDI. Many previous studies  
14 using iCBT have suggested its preventive effect on depression; however, no previous studies assessed  
15 the diagnosis of perinatal depression using the structural interview. This RCT with large sample size  
16 can lead to a definitive result.  
17  
18  
19  
20  
21  
22  
23  
24  
25

26 This study also will evaluate implementation outcomes of the program. Previous studies using  
27 iCBT have assessed the satisfaction with their program; however, few studies evaluated  
28 implementation outcomes including acceptability, adoption, appropriateness, feasibility, fidelity,  
29 implementation cost, penetration, and sustainability.[46] This study will contribute to the  
30 dissemination and implementation of iCBT in the future.  
31  
32  
33  
34  
35  
36

37 Another strength of this study is to add evidence of maternity blues. Maternity blues is highly  
38 prevalent, and it can present a range of symptoms such as intense short-lasting dysphoric mood,  
39 irritability, anxiety, sleep disturbance, and poor concentration within the first week following  
40 childbirth.[55] Maternity blues could lead to postpartum depression,[56] but to our knowledge, no  
41 previous studies have shown a preventive strategy to deal with maternity blues. This RCT will clarify  
42 whether iCBT during pregnancy can prevent maternity blues.  
43  
44  
45  
46  
47  
48  
49  
50

51 This study has several limitations. First, all outcomes will be measured by self-report, which  
52 could be affected by the perceptions of the participants. Second, users of the app are not regarded as  
53 representative of all pregnant women, though approximately 1 in 4 pregnant women in Japan are  
54 thought to use the app. Therefore, the findings of this study can not necessarily be generalizable. Third,  
55  
56  
57  
58  
59  
60

1  
2  
3  
4  
5  
6  
7  
8  
9  
10  
11  
12  
13  
14  
15  
16  
17  
18  
19  
20  
21  
22  
23  
24  
25  
26  
27  
28  
29  
30  
31  
32  
33  
34  
35  
36  
37  
38  
39  
40  
41  
42  
43  
44  
45  
46  
47  
48  
49  
50  
51  
52  
53  
54  
55  
56  
57  
58  
59  
60

follow-up period is not long enough, because a sizeable proportion of postpartum depression have onset after 3 months postpartum.

For peer review only

1  
2  
3  
4 **Author contributions** DN conceived and designed the study. DN, KI, EO, NS, and YS contributed  
5  
6 creating programs. NY and NK contributed to the development of study design. KW calculated sample  
7  
8 size. KW and YM developed analysis plan. DN wrote the first draft of the manuscript, and all other  
9  
10 authors revised the manuscript critically. All authors approved the final version of the manuscript.  
11

12  
13 **Funding** This work was supported by Japan Society for the Promotion of Science under a Grant-in-  
14  
15 Aid for Scientific Research (A) (19H01073 to DN)  
16

17  
18 **Disclaimer** The funder had no role in study design, data collection and analysis, decision to publish  
19  
20 or preparation of the manuscript.  
21

22  
23 **Competing interests** MTI Ltd. has been involved in this study as mentioned in the manuscript. NK  
24  
25 reports grants from Infocom Corp, Fujitsu Ltd, Fujitsu Software Technologies and TAK Ltd; personal  
26  
27 fees from Occupational Health Foundation, Japan Dental Association, Sekisui Chemicals, Junpukai  
28  
29 Health Care Center, Osaka Chamber of Commerce and Industry, outside the submitted work.  
30

31 **Patient consent for publication** Obtained.  
32

33  
34 **Ethics approval** The study plan was approved by the Research Ethics Review Board of Graduate  
35  
36 School of Medicine/Faculty of Medicine, the University of Tokyo (2019150NI).  
37  
38  
39  
40  
41

#### 42 **Figure legend:**

43  
44 Figure 1 Flow diagram of study participants  
45  
46  
47  
48  
49  
50  
51  
52  
53  
54  
55  
56  
57  
58  
59  
60

## References

1. Wisner KL, Miller ES, Tandon D. Attention to prevention-can we stop perinatal depression before it starts? *JAMA Psychiatry* 2019;76(4):355-6.
2. Bennett HA, Einarson A, Taddio A, et al. Prevalence of depression during pregnancy: systematic review. *Obstet Gynecol* 2004;103(4):698-709.
3. Hahn-Holbrook J, Cornwell-Hinrichs T, Anaya I. Economic and health Ppredictors of national postpartum depression prevalence: a systematic review, meta-analysis, and meta-Regression of 291 studies from 56 countries. *Front Psychiatry* 2017;8:248.
4. Takehara K, Suto M, Kakee N, et al. Prenatal and early postnatal depression and child maltreatment among Japanese fathers. *Child Abuse Negl* 2017;70:231-9.
5. Davis EP, Glynn LM, Schetter CD, et al. Prenatal exposure to maternal depression and cortisol influences infant temperament. *J Am Acad Child Adolesc Psychiatry* 2007;46(6):737-46.
6. Leech SL, Larkby CA, Day R, et al. Predictors and correlates of high levels of depression and anxiety symptoms among children at age 10. *J Am Acad Child Adolesc Psychiatry* 2006;45(2):223-30.
7. Field T, Diego M, Hernandez-Reif M. Prenatal depression effects on the fetus and newborn: a review. *Infant Behav Dev* 2006;29(3):445-55.
8. Diego MA, Field T, Hernandez-Reif M, et al. Prenatal depression restricts fetal growth. *Early*

1  
2  
3  
4 *Hum Dev* 2009;85(1):65-70.  
5  
6

- 7 9. Stein A, Pearson RM, Goodman SH, et al. Effects of perinatal mental disorders on the fetus  
8  
9 and child. *Lancet* 2014;384(9956):1800-19.  
10  
11  
12  
13 10. Underwood L, Waldie KE, Peterson E, et al. Paternal depression symptoms during pregnancy  
14  
15 and after childbirth among participants in the Growing Up in New Zealand Study. *JAMA Psychiatry*  
16  
17 2017;74(4):360-9.  
18  
19  
20  
21  
22 11. Lancaster CA, Gold KJ, Flynn HA, et al. Risk factors for depressive symptoms during  
23  
24 pregnancy: a systematic review. *Am J Obstet Gynecol* 2010;202(1):5-14.  
25  
26  
27  
28 12. Force USPST, Curry SJ, Krist AH, et al. Interventions to prevent perinatal depression: US  
29  
30 Preventive Services Task Force recommendation statement. *JAMA* 2019;321(6):580-7.  
31  
32  
33  
34 13. Sockol LE. A systematic review of the efficacy of cognitive behavioral therapy for treating  
35  
36 and preventing perinatal depression. *Journal of Affective Disorders* 2015;177:7-21.  
37  
38  
39  
40 14. Sockol LE. A systematic review and meta-analysis of interpersonal psychotherapy for  
41  
42 perinatal women. *Journal of Affective Disorders* 2018;232:316-28.  
43  
44  
45  
46 15. Sockol LE, Epperson CN, Barber JP. Preventing postpartum depression: a meta-analytic  
47  
48 review. *Clin Psychol Rev* 2013;33(8):1205-17.  
49  
50  
51  
52 16. Fairburn CG, Patel V. The impact of digital technology on psychological treatments and their  
53  
54 dissemination. *Behav Res Ther* 2017;88:19-25.  
55  
56  
57  
58 17. Loughnan SA, Joubert AE, Grierson A, et al. Internet-delivered psychological interventions  
59  
60

- 1  
2  
3  
4 for clinical anxiety and depression in perinatal women: a systematic review and meta-analysis. *Arch*  
5  
6  
7 *Womens Ment Health* 2019;22(6):737-50.  
8  
9
- 10 18. Barrera AZ, Wickham RE, Munoz RF. Online prevention of postpartum depression for  
11  
12 Spanish- and English-speaking pregnant women: a pilot randomized controlled trial. *Internet Interv*  
13  
14 2015;2(3):257-65.  
15  
16  
17
- 18 19. Haga SM, Drozd F, Lisoy C, et al. Mamma mia - a randomized controlled trial of an internet-  
20  
21 based intervention for perinatal depression. *Psychological medicine* 2019;49(11):1850-8.  
22  
23  
24
- 25 20. Imamura K, Kawakami N, Furukawa TA, et al. Does internet-based cognitive behavioral  
26  
27 therapy (iCBT) prevent major depressive episode for workers? A 12-month follow-up of a randomized  
28  
29 controlled trial. *Psychological medicine* 2015;45(9):1907-17.  
30  
31  
32
- 33 21. Henshaw C, Foreman D, Cox J. Postnatal blues: a risk factor for postnatal depression.  
34  
35 *Journal of psychosomatic obstetrics and gynaecology*. 2004;25(3-4):267-72.  
36  
37  
38
- 39 22. Chan AW, Tetzlaff JM, Gotzsche PC, et al. SPIRIT 2013 explanation and elaboration:  
40  
41 guidance for protocols of clinical trials. *BMJ* 2013;346:e7586.  
42  
43  
44
- 45 23. Kessler RC, Ustun TB. The World Mental Health (WMH) Survey Initiative Version of the World  
46  
47 Health Organization (WHO) Composite International Diagnostic Interview (CIDI). *Int J Methods*  
48  
49 *Psychiatr Res* 2004;13(2):93-121.  
50  
51  
52
- 53 24. Padesky CA, Greenberger D. *Clinician's Guide to Mind over Mood*. New York: Guilford Press  
54  
55  
56  
57  
58 1995.  
59  
60

- 1  
2  
3  
4 25. Cassar J, Ross J, Dahne J, et al. Therapist tips for the brief behavioural activation therapy  
5  
6  
7 for depression - revised (BATD-R) treatment manual practical wisdom and clinical nuance. *Clin*  
8  
9  
10 *Psychol (Aust Psychol Soc)* 2016;20(1):46-53.  
11  
12  
13 26. Hayes SC, Stroschl K, Wilson KG. Acceptance and Commitment Therapy: An Experiential  
14  
15  
16 Approach to Behavior Change. New York: Guilford Press 1999.  
17  
18  
19 27. Gilbert P. The Compassionate Mind: A New Approach to Life's Challenges. Oakland:  
20  
21  
22 Constable & Robinson 2009.  
23  
24  
25 28. Zessin U, Dickhauser O, Garbade S. The relationship between self-compassion and well-  
26  
27  
28 being: a meta-analysis. *Appl Psychol Health Well Being* 2015;7(3):340-64.  
29  
30  
31 29. Kabat-Zinn J. Wherever You Go, There You Are: Mindfulness Meditation in Everyday Life.  
32  
33  
34 New York: Hyperion Books 1994.  
35  
36  
37 30. D'Zurilla TJ, Goldfried MR. Problem solving and behavior modification. *J Abnorm Psychol*  
38  
39  
40 1971;78(1):107-26.  
41  
42  
43 31. Cox JL, Holden JM, Sagovsky R. Detection of postnatal depression. Development of the 10-  
44  
45  
46 item Edinburgh Postnatal Depression Scale. *Br J Psychiatry*. 1987;150:782-6.  
47  
48  
49 32. Okano T, Murata M, Masuji F, Tamaki R, Nomura J, Miyaoko H. Validation and reliability of  
50  
51  
52 Japanese version of the EPDS. *Arch Psychiatr Diag Clin Evaluat*. 1996;7(4):525-33.  
53  
54  
55 33. Kessler RC, Andrews G, Colpe LJ, et al. Short screening scales to monitor population  
56  
57  
58 prevalences and trends in non-specific psychological distress. *Psychological medicine*  
59  
60

1  
2  
3  
4 2002;32(6):959-76.  
5  
6

7 34. Furukawa TA, Kawakami N, Saitoh M, et al. The performance of the Japanese version of the  
8  
9 K6 and K10 in the World Mental Health Survey Japan. *Int J Methods Psychiatr Res* 2008;17(3):152-8.  
10  
11

12  
13 35. Herdman M, Gudex C, Lloyd et al. Development and preliminary testing of the new five-level  
14  
15 version of EQ-5D (EQ-5D-5L). *Qual Life Res* 2011;20(10):1727-36.  
16  
17

18  
19 36. van Hout B, Janssen MF, Feng YS, et al. Interim scoring for the EQ-5D-5L: mapping the EQ-  
20  
21 5D-5L to EQ-5D-3L value sets. *Value Health* 2012;15(5):708-15.  
22  
23

24  
25 37. Ikeda S, Shiroiwa T, Igarashi A, et al. Developing a Japanese version of the EQ-5D-5L value  
26  
27 set. *Journal of the National Institute of Public Health* 2015;64(1):47-55.  
28  
29

30  
31 38. Gierk B, Kohlmann S, Kroenke K, et al. The somatic symptom scale-8 (SSS-8): a brief  
32  
33 measure of somatic symptom burden. *JAMA Intern Med* 2014;174(3):399-407.  
34  
35

36  
37 39. Matsudaira K, Oka H, Kawaguchi M, et al. Development of a Japanese version of the Somatic  
38  
39 Symptom Scale-8: psychometric validity and internal consistency. *Gen Hosp Psychiatry* 2017;45:7-  
40  
41 11.  
42  
43  
44

45  
46 40. Nishi D, Uehara R, Yoshikawa E, et al. Culturally sensitive and universal measure of resilience  
47  
48 for Japanese populations: Tachikawa Resilience Scale in comparison with Resilience Scale 14-item  
49  
50 version. *Psychiatry and Clinical Neurosciences* 2013;67(3):174-81.  
51  
52

53  
54  
55 41. Bastien CH, Vallieres A, Morin CM. Validation of the Insomnia Severity Index as an outcome  
56  
57 measure for insomnia research. *Sleep Med* 2001;2(4):297-307.  
58  
59



- 1  
2  
3  
4 42. Munezawa T, Morin CM, Inoue Y, et al. Development of the Japanese version of the Insomnia  
5  
6  
7 Severity Index (ISI-J) *Seishinkachiryogaku* 2009;24(2):219-25.  
8  
9  
10 43. Allen RP, Burchell BJ, MacDonald B, et al. Validation of the self-completed Cambridge-  
11  
12  
13 Hopkins questionnaire (CH-RLSq) for ascertainment of restless legs syndrome (RLS) in a population  
14  
15  
16 survey. *Sleep Med* 2009;10(10):1097-100.  
17  
18  
19 44. Kondo H, Okada M, Eto H, et al. Development of Cambridge-Hopkins Questionnaire 13  
20  
21  
22 Japanese version short form (CH-RLSq13) version 2.1 in the assessment of restless legs syndrome  
23  
24  
25 (in Japanese). *Suiminiryō* 2016;10:577-84.  
26  
27  
28 45. Yoshida H, Yamanaka T, Khono G, et al. The study for the development of maternal anxiety  
29  
30  
31 scales-1: models for mothers rearing 4 · 5 month-old and 10 · 11 month-old infants.  
32  
33  
34 *Syonihokenkenkyū* 2013;72(5):680-9.  
35  
36  
37 46. Proctor E, Silmere H, Raghavan R, et al. Outcomes for implementation research: conceptual  
38  
39  
40 distinctions, measurement challenges, and research agenda. *Adm Policy Ment Health*  
41  
42  
43 2011;38(2):65-76.  
44  
45  
46 47. Lewis CC, Fischer S, Weiner BJ, et al. Outcomes for implementation science: an enhanced  
47  
48  
49 systematic review of instruments using evidence-based rating criteria. *Implement Sci* 2015;10:155.  
50  
51  
52 48. Weiner BJ, Lewis CC, Stanick C, et al. Psychometric assessment of three newly developed  
53  
54  
55 implementation outcome measures. *Implement Sci* 2017;12(1):108.  
56  
57  
58 49. Cuijpers P, van Straten A, Smit F, et al. Preventing the onset of depressive disorders: a  
59  
60

1  
2  
3  
4 meta-analytic review of psychological interventions. *Am J Psychiatry* 2008;165(10):1272-80.  
5  
6

7 50. Robins JM, Finkelstein DM. Correcting for noncompliance and dependent censoring in an  
8  
9  
10 AIDS clinical trial with inverse probability of censoring weighted (IPCW) log-rank tests. *Biometrics*  
11  
12  
13 2000;56(3):779-88.  
14

15  
16 51. Richards DA, Ekers D, McMillan D, et al. Cost and outcome of behavioural activation versus  
17  
18  
19 cognitive behavioural therapy for depression (COBRA): a randomised, controlled, non-inferiority trial.  
20  
21  
22 *Lancet* 2016;388(10047):871-80.  
23

24  
25 52. Ministry of Health WaL. Survey of Medical Care Activities in Public Health Insurance in 2016  
26  
27  
28 (in Japanese) [Available from: <https://www.mhlw.go.jp/toukei/saikin/hw/sinryo/tyosa16/>]  
29

30  
31 53. Blei DM, Ng AY, Jordan MI. Latent dirichlet allocation. *Journal of Machine Learning Research*  
32  
33  
34 2003:993-1022.  
35

36  
37 54. Scikit-learn. [Available from: [https://scikit-](https://scikit-learn.org/stable/modules/generated/sklearn.decomposition.LatentDirichletAllocation.html)  
38  
39  
40 [learn.org/stable/modules/generated/sklearn.decomposition.LatentDirichletAllocation.html](https://scikit-learn.org/stable/modules/generated/sklearn.decomposition.LatentDirichletAllocation.html).  
41

42  
43 55. Kennerley H, Gath D. Maternity blues. I. detection and measurement by questionnaire. *Br J*  
44  
45  
46 *Psychiatry* 1989;155:356-62.  
47

48  
49 56. Hannah P, Adams D, Lee A, et al. Links between early post-partum mood and post-natal  
50  
51  
52 depression. *Br J Psychiatry* 1992;160:777-80.  
53  
54  
55  
56  
57  
58  
59  
60

1  
2  
3  
4  
5  
6  
7  
8  
9  
10  
11  
12  
13  
14  
15  
16  
17  
18  
19  
20  
21  
22  
23  
24  
25  
26  
27  
28  
29  
30  
31  
32  
33  
34  
35  
36  
37  
38  
39  
40  
41  
42  
43  
44  
45  
46  
47  
48  
49  
50  
51  
52  
53  
54  
55  
56  
57  
58  
59  
60

For peer review only

**Table 1** Contents of internet cognitive behavioral therapy program

| <b>Module No</b> | <b>Techniques for stress management</b>              |
|------------------|------------------------------------------------------|
| Module 1         | Psychoeducation                                      |
| Module 2         | Case formulation based on cognitive behavioral model |
| Module 3         | Behavioral activation                                |
| Module 4         | Self-compassion                                      |
| Module 5         | Mindfulness                                          |
| Module 6         | Problem solving                                      |

**Table 2** Overview of measurements

|                               |                        | Baseline | 32 weeks  | 34 weeks  | 1 week     | 3 months   |
|-------------------------------|------------------------|----------|-----------|-----------|------------|------------|
|                               |                        | (T1)     | gestation | gestation | postpartum | postpartum |
| Measurement                   | Aim                    | (T2)     | (T3)      | (T4)      | (T5)       |            |
| <i>Primary outcomes</i>       |                        |          |           |           |            |            |
| CIDI                          | Diagnosis of           | ✓        | ✓         |           |            | ✓          |
|                               | Major Depressive       |          |           |           |            |            |
|                               | Episode                |          |           |           |            |            |
| <i>Secondary outcomes</i>     |                        |          |           |           |            |            |
| EPDS                          | Depressive symptoms    | ✓        | ✓         |           | ✓          | ✓          |
| K6                            | Psychological distress | ✓        | ✓         |           | ✓          | ✓          |
| ED-5D-5L                      | Quality of life        | ✓        | ✓         |           |            | ✓          |
| SSS-8                         | Somatic symptoms       | ✓        | ✓         |           |            | ✓          |
| TRS                           | Resilience             | ✓        | ✓         |           |            | ✓          |
| ISI                           | Insomnia               | ✓        | ✓         |           |            | ✓          |
| CH-RLSq13                     | Restless legs syndrome | ✓        | ✓         |           |            | ✓          |
| Maternal Anxiety              |                        |          |           |           |            |            |
| Scale for 4-5 months children | Maternal anxiety       |          |           |           |            | ✓          |
| Medical costs                 | Medical service        | ✓        | ✓         |           |            | ✓          |

1  
2  
3  
4  
5  
6  
7  
8  
9  
10  
11  
12  
13  
14  
15  
16  
17  
18  
19  
20  
21  
22  
23  
24  
25  
26  
27  
28  
29  
30  
31  
32  
33  
34  
35  
36  
37  
38  
39  
40  
41  
42  
43  
44  
45  
46  
47  
48  
49  
50  
51  
52  
53  
54  
55  
56  
57  
58  
59  
60

use

Implementation      Implementation

✓

and satisfaction      outcomes

Adverse effects      Physical and

✓

mental symptoms

*Baseline assessments*

Demographics

✓

VAWS

✓

CIDI, World Health Organization Composite International Diagnostic Interview 3.0; EPDS, The Edinburgh Postnatal Depression Scale; K6, Kessler's Psychological Distress Scale; ED-5D-5L, EuroQol -5 dimension-5 level; SSS-8, Somatic symptom Scale-8; TRS, Tachikawa Resilience Scale; ISI, The Insomnia Severity Index; CH-RLSq13, Cambridge-Hopkins questionnaire short form; VAWS, Violence Against Women Screen

Figure 1

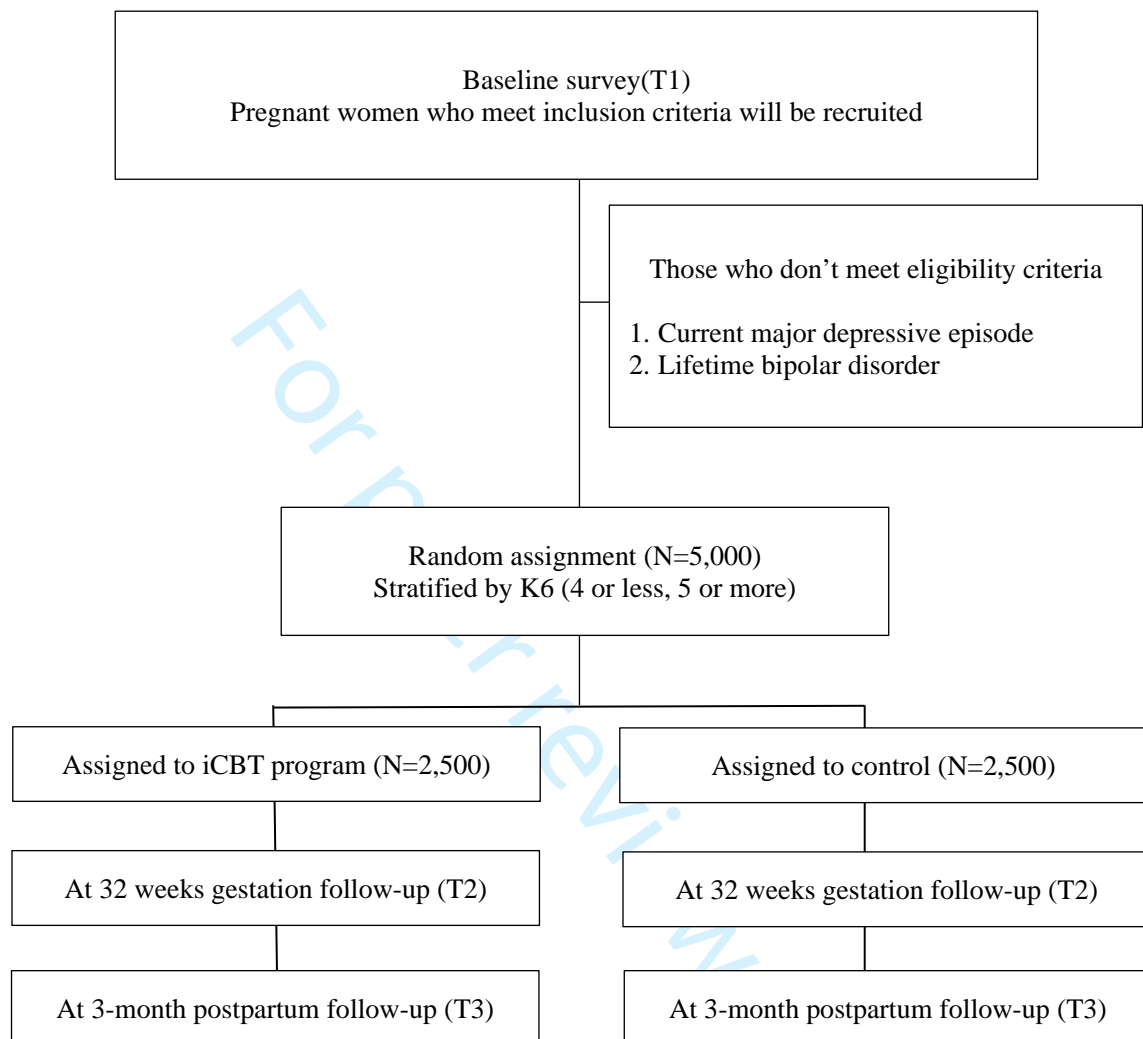

# Reporting checklist for protocol of a clinical trial.

Based on the SPIRIT guidelines.

## Instructions to authors

Complete this checklist by entering the page numbers from your manuscript where readers will find each of the items listed below.

Your article may not currently address all the items on the checklist. Please modify your text to include the missing information. If you are certain that an item does not apply, please write "n/a" and provide a short explanation.

Upload your completed checklist as an extra file when you submit to a journal.

In your methods section, say that you used the SPIRIT reporting guidelines, and cite them as:

Chan A-W, Tetzlaff JM, Altman DG, Laupacis A, Gøtzsche PC, Krleža-Jerić K, Hróbjartsson A, Mann H, Dickersin K, Berlin J, Doré C, Parulekar W, Summerskill W, Groves T, Schulz K, Sox H, Rockhold FW, Rennie D, Moher D. SPIRIT 2013 Statement: Defining standard protocol items for clinical trials. *Ann Intern Med.* 2013;158(3):200-207

|                                   |                                                                                                                                 |  | Page   |
|-----------------------------------|---------------------------------------------------------------------------------------------------------------------------------|--|--------|
|                                   | Reporting Item                                                                                                                  |  | Number |
| <b>Administrative information</b> |                                                                                                                                 |  |        |
| Title                             | <a href="#">#1</a> Descriptive title identifying the study design, population, interventions, and, if applicable, trial acronym |  | 1      |



|    |                     |                     |                                                            |    |
|----|---------------------|---------------------|------------------------------------------------------------|----|
| 1  | Trial registration  | <a href="#">#2a</a> | Trial identifier and registry name. If not yet registered, | 2  |
| 2  |                     |                     | name of intended registry                                  |    |
| 3  |                     |                     |                                                            |    |
| 4  |                     |                     |                                                            |    |
| 5  |                     |                     |                                                            |    |
| 6  | Trial registration: | <a href="#">#2b</a> | All items from the World Health Organization Trial         | NA |
| 7  | data set            |                     | Registration Data Set                                      |    |
| 8  |                     |                     |                                                            |    |
| 9  |                     |                     |                                                            |    |
| 10 |                     |                     |                                                            |    |
| 11 | Protocol version    | <a href="#">#3</a>  | Date and version identifier                                | 2  |
| 12 |                     |                     |                                                            |    |
| 13 |                     |                     |                                                            |    |
| 14 |                     |                     |                                                            |    |
| 15 | Funding             | <a href="#">#4</a>  | Sources and types of financial, material, and other        | 23 |
| 16 |                     |                     | support                                                    |    |
| 17 |                     |                     |                                                            |    |
| 18 |                     |                     |                                                            |    |
| 19 |                     |                     |                                                            |    |
| 20 | Roles and           | <a href="#">#5a</a> | Names, affiliations, and roles of protocol contributors    | 23 |
| 21 | responsibilities:   |                     |                                                            |    |
| 22 |                     |                     |                                                            |    |
| 23 | contributorship     |                     |                                                            |    |
| 24 |                     |                     |                                                            |    |
| 25 |                     |                     |                                                            |    |
| 26 |                     |                     |                                                            |    |
| 27 |                     |                     |                                                            |    |
| 28 | Roles and           | <a href="#">#5b</a> | Name and contact information for the trial sponsor         | NA |
| 29 | responsibilities:   |                     |                                                            |    |
| 30 |                     |                     |                                                            |    |
| 31 | sponsor contact     |                     |                                                            |    |
| 32 |                     |                     |                                                            |    |
| 33 | information         |                     |                                                            |    |
| 34 |                     |                     |                                                            |    |
| 35 |                     |                     |                                                            |    |
| 36 |                     |                     |                                                            |    |
| 37 |                     |                     |                                                            |    |
| 38 | Roles and           | <a href="#">#5c</a> | Role of study sponsor and funders, if any, in study        | NA |
| 39 | responsibilities:   |                     | design; collection, management, analysis, and              |    |
| 40 |                     |                     | interpretation of data; writing of the report; and the     |    |
| 41 | sponsor and funder  |                     | decision to submit the report for publication, including   |    |
| 42 |                     |                     | whether they will have ultimate authority over any of      |    |
| 43 |                     |                     | these activities                                           |    |
| 44 |                     |                     |                                                            |    |
| 45 |                     |                     |                                                            |    |
| 46 |                     |                     |                                                            |    |
| 47 |                     |                     |                                                            |    |
| 48 |                     |                     |                                                            |    |
| 49 |                     |                     |                                                            |    |
| 50 |                     |                     |                                                            |    |
| 51 |                     |                     |                                                            |    |
| 52 | Roles and           | <a href="#">#5d</a> | Composition, roles, and responsibilities of the            | NA |
| 53 | responsibilities:   |                     | coordinating centre, steering committee, endpoint          |    |
| 54 |                     |                     | adjudication committee, data management team, and          |    |
| 55 | committees          |                     |                                                            |    |
| 56 |                     |                     |                                                            |    |
| 57 |                     |                     |                                                            |    |
| 58 |                     |                     |                                                            |    |
| 59 |                     |                     |                                                            |    |
| 60 |                     |                     |                                                            |    |

other individuals or groups overseeing the trial, if applicable (see Item 21a for data monitoring committee)

## Introduction

|                                                 |                     |                                                                                                                                                                                                            |     |
|-------------------------------------------------|---------------------|------------------------------------------------------------------------------------------------------------------------------------------------------------------------------------------------------------|-----|
| Background and rationale                        | <a href="#">#6a</a> | Description of research question and justification for undertaking the trial, including summary of relevant studies (published and unpublished) examining benefits and harms for each intervention         | 4-5 |
| Background and rationale: choice of comparators | <a href="#">#6b</a> | Explanation for choice of comparators                                                                                                                                                                      | 4-5 |
| Objectives                                      | <a href="#">#7</a>  | Specific objectives or hypotheses                                                                                                                                                                          | 5   |
| Trial design                                    | <a href="#">#8</a>  | Description of trial design including type of trial (eg, parallel group, crossover, factorial, single group), allocation ratio, and framework (eg, superiority, equivalence, non-inferiority, exploratory) | 5   |
| <b>Methods:</b>                                 |                     |                                                                                                                                                                                                            |     |
| Participants, interventions, and outcomes       |                     |                                                                                                                                                                                                            |     |
| Study setting                                   | <a href="#">#9</a>  | Description of study settings (eg, community clinic, academic hospital) and list of countries where data will be collected. Reference to where list of study sites can be obtained                         | 5   |

|    |                      |                      |                                                              |       |
|----|----------------------|----------------------|--------------------------------------------------------------|-------|
| 1  | Eligibility criteria | <a href="#">#10</a>  | Inclusion and exclusion criteria for participants. If        | 6     |
| 2  |                      |                      |                                                              |       |
| 3  |                      |                      | applicable, eligibility criteria for study centres and       |       |
| 4  |                      |                      | individuals who will perform the interventions (eg,          |       |
| 5  |                      |                      | surgeons, psychotherapists)                                  |       |
| 6  |                      |                      |                                                              |       |
| 7  |                      |                      |                                                              |       |
| 8  |                      |                      |                                                              |       |
| 9  |                      |                      |                                                              |       |
| 10 |                      |                      |                                                              |       |
| 11 | Interventions:       | <a href="#">#11a</a> | Interventions for each group with sufficient detail to allow | 7-10  |
| 12 |                      |                      |                                                              |       |
| 13 | description          |                      | replication, including how and when they will be             |       |
| 14 |                      |                      |                                                              |       |
| 15 |                      |                      | administered                                                 |       |
| 16 |                      |                      |                                                              |       |
| 17 |                      |                      |                                                              |       |
| 18 |                      |                      |                                                              |       |
| 19 | Interventions:       | <a href="#">#11b</a> | Criteria for discontinuing or modifying allocated            | NA    |
| 20 |                      |                      |                                                              |       |
| 21 | modifications        |                      | interventions for a given trial participant (eg, drug dose   |       |
| 22 |                      |                      | change in response to harms, participant request, or         |       |
| 23 |                      |                      | improving / worsening disease)                               |       |
| 24 |                      |                      |                                                              |       |
| 25 |                      |                      |                                                              |       |
| 26 |                      |                      |                                                              |       |
| 27 |                      |                      |                                                              |       |
| 28 |                      |                      |                                                              |       |
| 29 | Interventions:       | <a href="#">#11c</a> | Strategies to improve adherence to intervention protocols,   | 14    |
| 30 |                      |                      |                                                              |       |
| 31 | adherence            |                      | and any procedures for monitoring adherence (eg, drug        |       |
| 32 |                      |                      | tablet return; laboratory tests)                             |       |
| 33 |                      |                      |                                                              |       |
| 34 |                      |                      |                                                              |       |
| 35 |                      |                      |                                                              |       |
| 36 | Interventions:       | <a href="#">#11d</a> | Relevant concomitant care and interventions that are         | NA    |
| 37 |                      |                      |                                                              |       |
| 38 | concomitant care     |                      | permitted or prohibited during the trial                     |       |
| 39 |                      |                      |                                                              |       |
| 40 |                      |                      |                                                              |       |
| 41 |                      |                      |                                                              |       |
| 42 | Outcomes             | <a href="#">#12</a>  | Primary, secondary, and other outcomes, including the        | 10-14 |
| 43 |                      |                      |                                                              |       |
| 44 |                      |                      | specific measurement variable (eg, systolic blood            |       |
| 45 |                      |                      | pressure), analysis metric (eg, change from baseline, final  |       |
| 46 |                      |                      | value, time to event), method of aggregation (eg, median,    |       |
| 47 |                      |                      | proportion), and time point for each outcome. Explanation    |       |
| 48 |                      |                      | of the clinical relevance of chosen efficacy and harm        |       |
| 49 |                      |                      | outcomes is strongly recommended                             |       |
| 50 |                      |                      |                                                              |       |
| 51 |                      |                      |                                                              |       |
| 52 |                      |                      |                                                              |       |
| 53 |                      |                      |                                                              |       |
| 54 |                      |                      |                                                              |       |
| 55 |                      |                      |                                                              |       |
| 56 |                      |                      |                                                              |       |
| 57 |                      |                      |                                                              |       |
| 58 |                      |                      |                                                              |       |
| 59 |                      |                      |                                                              |       |
| 60 |                      |                      |                                                              |       |

|    |                           |                      |                                                            |     |
|----|---------------------------|----------------------|------------------------------------------------------------|-----|
| 1  | Participant timeline      | <a href="#">#13</a>  | Time schedule of enrolment, interventions (including any   | 6-7 |
| 2  |                           |                      | run-ins and washouts), assessments, and visits for         |     |
| 3  |                           |                      | participants. A schematic diagram is highly recommended    |     |
| 4  |                           |                      | (see Figure)                                               |     |
| 5  |                           |                      |                                                            |     |
| 6  |                           |                      |                                                            |     |
| 7  |                           |                      |                                                            |     |
| 8  |                           |                      |                                                            |     |
| 9  |                           |                      |                                                            |     |
| 10 |                           |                      |                                                            |     |
| 11 | Sample size               | <a href="#">#14</a>  | Estimated number of participants needed to achieve         | 15  |
| 12 |                           |                      | study objectives and how it was determined, including      |     |
| 13 |                           |                      | clinical and statistical assumptions supporting any sample |     |
| 14 |                           |                      | size calculations                                          |     |
| 15 |                           |                      |                                                            |     |
| 16 |                           |                      |                                                            |     |
| 17 |                           |                      |                                                            |     |
| 18 |                           |                      |                                                            |     |
| 19 |                           |                      |                                                            |     |
| 20 |                           |                      |                                                            |     |
| 21 | Recruitment               | <a href="#">#15</a>  | Strategies for achieving adequate participant enrolment to | 6-7 |
| 22 |                           |                      | reach target sample size                                   |     |
| 23 |                           |                      |                                                            |     |
| 24 |                           |                      |                                                            |     |
| 25 |                           |                      |                                                            |     |
| 26 | <b>Methods:</b>           |                      |                                                            |     |
| 27 |                           |                      |                                                            |     |
| 28 | <b>Assignment of</b>      |                      |                                                            |     |
| 29 | <b>interventions (for</b> |                      |                                                            |     |
| 30 | <b>controlled trials)</b> |                      |                                                            |     |
| 31 |                           |                      |                                                            |     |
| 32 |                           |                      |                                                            |     |
| 33 |                           |                      |                                                            |     |
| 34 |                           |                      |                                                            |     |
| 35 |                           |                      |                                                            |     |
| 36 | Allocation: sequence      | <a href="#">#16a</a> | Method of generating the allocation sequence (eg,          | 16  |
| 37 | generation                |                      | computer-generated random numbers), and list of any        |     |
| 38 |                           |                      | factors for stratification. To reduce predictability of a  |     |
| 39 |                           |                      | random sequence, details of any planned restriction (eg,   |     |
| 40 |                           |                      | blocking) should be provided in a separate document that   |     |
| 41 |                           |                      | is unavailable to those who enrol participants or assign   |     |
| 42 |                           |                      | interventions                                              |     |
| 43 |                           |                      |                                                            |     |
| 44 |                           |                      |                                                            |     |
| 45 |                           |                      |                                                            |     |
| 46 |                           |                      |                                                            |     |
| 47 |                           |                      |                                                            |     |
| 48 |                           |                      |                                                            |     |
| 49 |                           |                      |                                                            |     |
| 50 |                           |                      |                                                            |     |
| 51 |                           |                      |                                                            |     |
| 52 |                           |                      |                                                            |     |
| 53 | Allocation                | <a href="#">#16b</a> | Mechanism of implementing the allocation sequence (eg,     | 16  |
| 54 | concealment               |                      | central telephone; sequentially numbered, opaque,          |     |
| 55 |                           |                      |                                                            |     |
| 56 |                           |                      |                                                            |     |
| 57 |                           |                      |                                                            |     |
| 58 | mechanism                 |                      |                                                            |     |
| 59 |                           |                      |                                                            |     |
| 60 |                           |                      |                                                            |     |

sealed envelopes), describing any steps to conceal the sequence until interventions are assigned

Allocation: [#16c](#) Who will generate the allocation sequence, who will enrol participants, and who will assign participants to interventions 16

Blinding (masking) [#17a](#) Who will be blinded after assignment to interventions (eg, trial participants, care providers, outcome assessors, data analysts), and how 16

Blinding (masking): [#17b](#) If blinded, circumstances under which unblinding is permissible, and procedure for revealing a participant's allocated intervention during the trial NA

**Methods: Data collection, management, and analysis**

Data collection plan [#18a](#) Plans for assessment and collection of outcome, baseline, and other trial data, including any related processes to promote data quality (eg, duplicate measurements, training of assessors) and a description of study instruments (eg, questionnaires, laboratory tests) along with their reliability and validity, if known. Reference to where data collection forms can be found, if not in the protocol 7

|    |                            |                      |                                                                |       |
|----|----------------------------|----------------------|----------------------------------------------------------------|-------|
| 1  | Data collection plan:      | <a href="#">#18b</a> | Plans to promote participant retention and complete            | 7     |
| 2  |                            |                      |                                                                |       |
| 3  | retention                  |                      | follow-up, including list of any outcome data to be            |       |
| 4  |                            |                      | collected for participants who discontinue or deviate from     |       |
| 5  |                            |                      | intervention protocols                                         |       |
| 6  |                            |                      |                                                                |       |
| 7  |                            |                      |                                                                |       |
| 8  |                            |                      |                                                                |       |
| 9  |                            |                      |                                                                |       |
| 10 |                            |                      |                                                                |       |
| 11 | Data management            | <a href="#">#19</a>  | Plans for data entry, coding, security, and storage,           | 15    |
| 12 |                            |                      | including any related processes to promote data quality        |       |
| 13 |                            |                      | (eg, double data entry; range checks for data values).         |       |
| 14 |                            |                      | Reference to where details of data management                  |       |
| 15 |                            |                      | procedures can be found, if not in the protocol                |       |
| 16 |                            |                      |                                                                |       |
| 17 |                            |                      |                                                                |       |
| 18 |                            |                      |                                                                |       |
| 19 |                            |                      |                                                                |       |
| 20 |                            |                      |                                                                |       |
| 21 |                            |                      |                                                                |       |
| 22 |                            |                      |                                                                |       |
| 23 | Statistics: outcomes       | <a href="#">#20a</a> | Statistical methods for analysing primary and secondary        | 16-17 |
| 24 |                            |                      | outcomes. Reference to where other details of the              |       |
| 25 |                            |                      | statistical analysis plan can be found, if not in the protocol |       |
| 26 |                            |                      |                                                                |       |
| 27 |                            |                      |                                                                |       |
| 28 |                            |                      |                                                                |       |
| 29 |                            |                      |                                                                |       |
| 30 |                            |                      |                                                                |       |
| 31 | Statistics: additional     | <a href="#">#20b</a> | Methods for any additional analyses (eg, subgroup and          | 17-18 |
| 32 | analyses                   |                      | adjusted analyses)                                             |       |
| 33 |                            |                      |                                                                |       |
| 34 |                            |                      |                                                                |       |
| 35 |                            |                      |                                                                |       |
| 36 | Statistics: analysis       | <a href="#">#20c</a> | Definition of analysis population relating to protocol non-    | 16-18 |
| 37 | population and             |                      | adherence (eg, as randomised analysis), and any                |       |
| 38 | missing data               |                      | statistical methods to handle missing data (eg, multiple       |       |
| 39 |                            |                      | imputation)                                                    |       |
| 40 |                            |                      |                                                                |       |
| 41 |                            |                      |                                                                |       |
| 42 |                            |                      |                                                                |       |
| 43 |                            |                      |                                                                |       |
| 44 |                            |                      |                                                                |       |
| 45 |                            |                      |                                                                |       |
| 46 | <b>Methods: Monitoring</b> |                      |                                                                |       |
| 47 |                            |                      |                                                                |       |
| 48 |                            |                      |                                                                |       |
| 49 | Data monitoring:           | <a href="#">#21a</a> | Composition of data monitoring committee (DMC);                | 18-19 |
| 50 | formal committee           |                      | summary of its role and reporting structure; statement of      |       |
| 51 |                            |                      | whether it is independent from the sponsor and                 |       |
| 52 |                            |                      | competing interests; and reference to where further            |       |
| 53 |                            |                      |                                                                |       |
| 54 |                            |                      |                                                                |       |
| 55 |                            |                      |                                                                |       |
| 56 |                            |                      |                                                                |       |
| 57 |                            |                      |                                                                |       |
| 58 |                            |                      |                                                                |       |
| 59 |                            |                      |                                                                |       |
| 60 |                            |                      |                                                                |       |

1 details about its charter can be found, if not in the  
 2 protocol. Alternatively, an explanation of why a DMC is  
 3 not needed  
 4  
 5  
 6  
 7

|    |                      |                      |                                                              |    |
|----|----------------------|----------------------|--------------------------------------------------------------|----|
| 8  | Data monitoring:     | <a href="#">#21b</a> | Description of any interim analyses and stopping             | NA |
| 9  | interim analysis     |                      | guidelines, including who will have access to these          |    |
| 10 |                      |                      | interim results and make the final decision to terminate     |    |
| 11 |                      |                      | the trial                                                    |    |
| 12 |                      |                      |                                                              |    |
| 13 |                      |                      |                                                              |    |
| 14 |                      |                      |                                                              |    |
| 15 |                      |                      |                                                              |    |
| 16 |                      |                      |                                                              |    |
| 17 |                      |                      |                                                              |    |
| 18 | Harms                | <a href="#">#22</a>  | Plans for collecting, assessing, reporting, and managing     | 15 |
| 19 |                      |                      | solicited and spontaneously reported adverse events and      |    |
| 20 |                      |                      | other unintended effects of trial interventions or trial     |    |
| 21 |                      |                      | conduct                                                      |    |
| 22 |                      |                      |                                                              |    |
| 23 |                      |                      |                                                              |    |
| 24 |                      |                      |                                                              |    |
| 25 |                      |                      |                                                              |    |
| 26 |                      |                      |                                                              |    |
| 27 |                      |                      |                                                              |    |
| 28 | Auditing             | <a href="#">#23</a>  | Frequency and procedures for auditing trial conduct, if      | 19 |
| 29 |                      |                      | any, and whether the process will be independent from        |    |
| 30 |                      |                      | investigators and the sponsor                                |    |
| 31 |                      |                      |                                                              |    |
| 32 |                      |                      |                                                              |    |
| 33 |                      |                      |                                                              |    |
| 34 |                      |                      |                                                              |    |
| 35 | <b>Ethics and</b>    |                      |                                                              |    |
| 36 | <b>dissemination</b> |                      |                                                              |    |
| 37 |                      |                      |                                                              |    |
| 38 |                      |                      |                                                              |    |
| 39 |                      |                      |                                                              |    |
| 40 |                      |                      |                                                              |    |
| 41 | Research ethics      | <a href="#">#24</a>  | Plans for seeking research ethics committee / institutional  | 2  |
| 42 | approval             |                      | review board (REC / IRB) approval                            |    |
| 43 |                      |                      |                                                              |    |
| 44 |                      |                      |                                                              |    |
| 45 |                      |                      |                                                              |    |
| 46 | Protocol             | <a href="#">#25</a>  | Plans for communicating important protocol modifications     | 20 |
| 47 | amendments           |                      | (eg, changes to eligibility criteria, outcomes, analyses) to |    |
| 48 |                      |                      | relevant parties (eg, investigators, REC / IRBs, trial       |    |
| 49 |                      |                      | participants, trial registries, journals, regulators)        |    |
| 50 |                      |                      |                                                              |    |
| 51 |                      |                      |                                                              |    |
| 52 |                      |                      |                                                              |    |
| 53 |                      |                      |                                                              |    |
| 54 |                      |                      |                                                              |    |
| 55 |                      |                      |                                                              |    |
| 56 |                      |                      |                                                              |    |
| 57 |                      |                      |                                                              |    |
| 58 |                      |                      |                                                              |    |
| 59 |                      |                      |                                                              |    |
| 60 |                      |                      |                                                              |    |

|    |                       |                      |                                                                |       |
|----|-----------------------|----------------------|----------------------------------------------------------------|-------|
| 1  | Consent or assent     | <a href="#">#26a</a> | Who will obtain informed consent or assent from potential      | 6, 20 |
| 2  |                       |                      | trial participants or authorised surrogates, and how (see      |       |
| 3  |                       |                      | Item 32)                                                       |       |
| 4  |                       |                      |                                                                |       |
| 5  |                       |                      |                                                                |       |
| 6  |                       |                      |                                                                |       |
| 7  |                       |                      |                                                                |       |
| 8  | Consent or assent:    | <a href="#">#26b</a> | Additional consent provisions for collection and use of        | NA    |
| 9  | ancillary studies     |                      | participant data and biological specimens in ancillary         |       |
| 10 |                       |                      | studies, if applicable                                         |       |
| 11 |                       |                      |                                                                |       |
| 12 |                       |                      |                                                                |       |
| 13 |                       |                      |                                                                |       |
| 14 |                       |                      |                                                                |       |
| 15 |                       |                      |                                                                |       |
| 16 | Confidentiality       | <a href="#">#27</a>  | How personal information about potential and enrolled          | 20    |
| 17 |                       |                      | participants will be collected, shared, and maintained in      |       |
| 18 |                       |                      | order to protect confidentiality before, during, and after     |       |
| 19 |                       |                      | the trial                                                      |       |
| 20 |                       |                      |                                                                |       |
| 21 |                       |                      |                                                                |       |
| 22 |                       |                      |                                                                |       |
| 23 |                       |                      |                                                                |       |
| 24 |                       |                      |                                                                |       |
| 25 |                       |                      |                                                                |       |
| 26 | Declaration of        | <a href="#">#28</a>  | Financial and other competing interests for principal          | 23    |
| 27 | interests             |                      | investigators for the overall trial and each study site        |       |
| 28 |                       |                      |                                                                |       |
| 29 |                       |                      |                                                                |       |
| 30 |                       |                      |                                                                |       |
| 31 | Data access           | <a href="#">#29</a>  | Statement of who will have access to the final trial           | 20    |
| 32 |                       |                      | dataset, and disclosure of contractual agreements that         |       |
| 33 |                       |                      | limit such access for investigators                            |       |
| 34 |                       |                      |                                                                |       |
| 35 |                       |                      |                                                                |       |
| 36 |                       |                      |                                                                |       |
| 37 |                       |                      |                                                                |       |
| 38 |                       |                      |                                                                |       |
| 39 | Ancillary and post    | <a href="#">#30</a>  | Provisions, if any, for ancillary and post-trial care, and for | NA    |
| 40 | trial care            |                      | compensation to those who suffer harm from trial               |       |
| 41 |                       |                      | participation                                                  |       |
| 42 |                       |                      |                                                                |       |
| 43 |                       |                      |                                                                |       |
| 44 |                       |                      |                                                                |       |
| 45 |                       |                      |                                                                |       |
| 46 |                       |                      |                                                                |       |
| 47 | Dissemination policy: | <a href="#">#31a</a> | Plans for investigators and sponsor to communicate trial       | 21    |
| 48 | trial results         |                      | results to participants, healthcare professionals, the         |       |
| 49 |                       |                      | public, and other relevant groups (eg, via publication,        |       |
| 50 |                       |                      | reporting in results databases, or other data sharing          |       |
| 51 |                       |                      | arrangements), including any publication restrictions          |       |
| 52 |                       |                      |                                                                |       |
| 53 |                       |                      |                                                                |       |
| 54 |                       |                      |                                                                |       |
| 55 |                       |                      |                                                                |       |
| 56 |                       |                      |                                                                |       |
| 57 |                       |                      |                                                                |       |
| 58 |                       |                      |                                                                |       |
| 59 |                       |                      |                                                                |       |
| 60 |                       |                      |                                                                |       |



1 Dissemination policy: [#31b](#) Authorship eligibility guidelines and any intended use of 21  
 2  
 3 authorship professional writers  
 4  
 5

6 Dissemination policy: [#31c](#) Plans, if any, for granting public access to the full 19  
 7  
 8 reproducible protocol, participant-level dataset, and statistical code  
 9  
 10 research  
 11  
 12

## 13 Appendices

14  
 15  
 16  
 17 Informed consent [#32](#) Model consent form and other related documentation NA  
 18  
 19 materials given to participants and authorised surrogates  
 20  
 21

22  
 23 Biological specimens [#33](#) Plans for collection, laboratory evaluation, and storage of NA  
 24  
 25 biological specimens for genetic or molecular analysis in  
 26  
 27 the current trial and for future use in ancillary studies, if  
 28  
 29 applicable  
 30  
 31

32  
 33 None The SPIRIT checklist is distributed under the terms of the Creative Commons Attribution  
 34  
 35 License CC-BY-ND 3.0. This checklist can be completed online using <https://www.goodreports.org/>, a  
 36  
 37 tool made by the [EQUATOR Network](#) in collaboration with [Penelope.ai](#)  
 38  
 39  
 40  
 41  
 42  
 43  
 44  
 45  
 46  
 47  
 48  
 49  
 50  
 51  
 52  
 53  
 54  
 55  
 56  
 57  
 58  
 59  
 60
